# Supplementary material for: Identification of Position-Specific Correlations between DNA-Binding Domains and Their Binding Sites. Application to the MerR Family of Transcription Factors
Source: PubMed Central journal article supplement (PMC5045206; doi:10.1371/journal.pone.0162681), 2016-09-30
Supplement: pone.0162681.s001.pdf [file pone.0162681.s001.pdf]

**Supporting material S1. Positional weighted matrices (PWMs) used to search the genomes for binding sites**

**CueR**

| a     | c     | g     | t     |
|-------|-------|-------|-------|
| 0.46  | -0.15 | -0.15 | -0.15 |
| -0.21 | 0.40  | 0.02  | -0.21 |
| -0.23 | 0.38  | -0.07 | -0.07 |
| -0.21 | 0.02  | -0.21 | 0.40  |
| -0.15 | -0.15 | -0.15 | 0.46  |
| 0.08  | 0.22  | 0.03  | -0.33 |
| 0.07  | 0.32  | -0.27 | -0.12 |
| 0.15  | 0.34  | -0.24 | -0.24 |
| 0.10  | 0.08  | -0.06 | -0.12 |
| -0.30 | 0.11  | -0.08 | 0.27  |
| -0.03 | -0.08 | 0.04  | 0.07  |
| 0.23  | -0.14 | 0.21  | -0.30 |
| -0.17 | 0.04  | 0.01  | 0.12  |
| -0.14 | -0.29 | 0.26  | 0.17  |
| -0.06 | -0.28 | 0.31  | 0.03  |
| -0.32 | 0.12  | 0.24  | -0.04 |
| 0.46  | -0.15 | -0.15 | -0.15 |
| 0.36  | -0.23 | 0.10  | -0.23 |
| -0.23 | -0.07 | 0.38  | -0.07 |
| -0.25 | 0.18  | 0.32  | -0.25 |
| 0.01  | -0.10 | -0.17 | 0.26  |

=MinScore=5.1, MaxScore=6.1

\*\*\*\*\*

===== Training Set: =====

|    |      |                        |
|----|------|------------------------|
| 01 | 6.12 | accttccccttgctggaaggt  |
| 29 | 6.06 | accttcccacagtgggaaggt  |
| 24 | 6.02 | accttgccatggcggaaggt   |
| 36 | 6.00 | accttcccattattggaagga  |
| 26 | 5.98 | accttcccgttgctggaaggt  |
| 17 | 5.91 | accttaccatgatggcaagct  |
| 15 | 5.87 | accttacccttgaggaaggt   |
| 07 | 5.86 | accttcaccttgctggaaggt  |
| 37 | 5.85 | accttaccattggtggaagga  |
| 30 | 5.83 | accttccaatggtggtaaggt  |
| 05 | 5.82 | accttcccacaatggcaagct  |
| 23 | 5.78 | accttaccctcatgggaagga  |
| 03 | 5.73 | acctaaccttgctggaaggt   |
| 02 | 5.71 | accttcccgttaaggggaagga |
| 21 | 5.71 | accttcccattgatgggaatct |
| 34 | 5.69 | accttcccattcatgggaagcc |
| 04 | 5.69 | accttcccgttagggcagggt  |
| 11 | 5.67 | agcttccccttaggggaagct  |
| 10 | 5.67 | agcttccccttaggggaagct  |
| 08 | 5.66 | accttccccccagggggagggt |
| 28 | 5.65 | accttccagtcgctggaaggt  |

|    |      |                        |
|----|------|------------------------|
| 22 | 5.53 | accttaccatgatgtcaagga  |
| 19 | 5.52 | accttcccgctggggcagggt  |
| 18 | 5.46 | acgttccccttgatggaaggt  |
| 35 | 5.46 | accttgccacgatggaagcc   |
| 38 | 5.43 | accttccaacggttgaaggg   |
| 09 | 5.43 | accttcccctaagaggagggt  |
| 06 | 5.42 | accttccaacactggcaaggt  |
| 32 | 5.40 | accttgctctgatggcaagct  |
| 20 | 5.40 | accttacaatcatgacaaggt  |
| 16 | 5.37 | accctccccttgctagaaggt  |
| 39 | 5.37 | accttccaacgatgggaacct  |
| 12 | 5.37 | accttccattaactgtaaggt  |
| 27 | 5.36 | accttccatgggctggaaggt  |
| 31 | 5.31 | accttgctgctgctggcaaggt |
| 33 | 5.30 | accttgccatgatgttagggt  |
| 13 | 5.28 | actttaaccttgctggaaggt  |
| 14 | 5.11 | accttaaccctaggtcaagct  |
| 25 | 5.09 | accctgacatgatgtcaaggt  |

### MerR

#### Proteobacteria

| a     | c     | g     | t     |
|-------|-------|-------|-------|
| 0.36  | 0.00  | -0.18 | -0.18 |
| -0.20 | 0.33  | -0.20 | 0.07  |
| -0.18 | 0.00  | -0.18 | 0.36  |
| -0.14 | 0.42  | -0.14 | -0.14 |
| -0.18 | 0.36  | -0.18 | 0.00  |
| -0.14 | -0.14 | 0.42  | -0.14 |
| -0.14 | -0.14 | -0.14 | 0.42  |
| 0.42  | -0.14 | -0.14 | -0.14 |
| -0.18 | 0.36  | 0.00  | -0.18 |
| 0.05  | 0.05  | -0.28 | 0.18  |
| 0.01  | 0.01  | -0.26 | 0.24  |
| 0.09  | -0.13 | -0.05 | 0.09  |
| 0.21  | -0.22 | 0.24  | -0.22 |
| -0.22 | 0.18  | 0.26  | -0.22 |
| -0.14 | -0.14 | -0.14 | 0.42  |
| 0.42  | -0.14 | -0.14 | -0.14 |
| -0.14 | 0.42  | -0.14 | -0.14 |
| -0.14 | -0.14 | 0.42  | -0.14 |
| -0.18 | 0.00  | 0.36  | -0.18 |
| 0.31  | -0.04 | -0.04 | -0.23 |
| 0.18  | 0.00  | 0.10  | -0.28 |
| -0.06 | -0.01 | 0.04  | 0.04  |

=MinScore=5.6, MaxScore=7.0  
\*\*\*\*\*  
===== Training Set: =====  
06 6.99 actccgtacttaagtacggaag  
02 6.88 actccgtacattggtacggaag

|    |      |                         |
|----|------|-------------------------|
| 01 | 6.79 | actccgtacataactacggaag  |
| 05 | 6.78 | actccgtacttgactacggaag  |
| 08 | 6.67 | attccgtactttggtacggagt  |
| 07 | 6.65 | actccgtaccttggtacggacc  |
| 13 | 6.48 | actccgtacatcggtacggaga  |
| 12 | 6.44 | actccgtactatggtacggcat  |
| 11 | 6.42 | actccgtacttgagtacggggt  |
| 03 | 6.33 | accccgtaacctaactacggaaa |
| 09 | 6.20 | actccgtactcaggtacgcacc  |
| 10 | 6.18 | actctgtaccatgctacggaac  |
| 04 | 5.63 | cttccgtagtcaactacggagt  |

### Firmicutes

| a     | c     | g     | t     |
|-------|-------|-------|-------|
| 0.39  | -0.13 | -0.13 | -0.13 |
| -0.13 | 0.39  | -0.13 | -0.13 |
| -0.18 | 0.28  | -0.18 | 0.08  |
| 0.03  | 0.03  | 0.16  | -0.23 |
| -0.13 | -0.13 | -0.13 | 0.39  |
| -0.13 | -0.13 | 0.39  | -0.13 |
| -0.13 | -0.13 | -0.13 | 0.39  |
| 0.39  | -0.13 | -0.13 | -0.13 |
| -0.13 | 0.39  | -0.13 | -0.13 |
| -0.18 | 0.08  | -0.18 | 0.28  |
| 0.28  | -0.18 | -0.18 | 0.08  |
| -0.13 | -0.13 | -0.13 | 0.39  |
| 0.19  | -0.19 | 0.19  | -0.19 |
| -0.13 | -0.13 | 0.39  | -0.13 |
| -0.13 | -0.13 | -0.13 | 0.39  |
| 0.39  | -0.13 | -0.13 | -0.13 |
| -0.13 | 0.39  | -0.13 | -0.13 |
| 0.39  | -0.13 | -0.13 | -0.13 |
| 0.03  | -0.23 | 0.16  | 0.03  |
| -0.13 | -0.13 | 0.39  | -0.13 |
| -0.13 | -0.13 | 0.39  | -0.13 |
| -0.13 | -0.13 | -0.13 | 0.39  |

=MinScore=6.7, MaxScore=7.6

\*\*\*\*\*

===== Training Set: =====

|    |      |                         |
|----|------|-------------------------|
| 01 | 7.59 | accgtgtactatagtacagggt  |
| 04 | 7.47 | accgtgtactatggtacatggt  |
| 02 | 7.47 | accctgtactatggtacagggt  |
| 03 | 6.74 | actatgtaccttagtacaagggt |

### CadR-PbrR

| a    | c     | g     | t     |
|------|-------|-------|-------|
| 0.42 | -0.14 | -0.14 | -0.14 |

|       |       |       |       |
|-------|-------|-------|-------|
| -0.14 | 0.42  | -0.14 | -0.14 |
| -0.22 | 0.28  | -0.22 | 0.15  |
| -0.07 | 0.22  | -0.26 | 0.11  |
| -0.14 | -0.14 | -0.14 | 0.42  |
| 0.23  | -0.22 | 0.21  | -0.22 |
| -0.20 | -0.20 | 0.07  | 0.33  |
| 0.42  | -0.14 | -0.14 | -0.14 |
| 0.00  | -0.18 | 0.36  | -0.18 |
| -0.20 | 0.07  | -0.20 | 0.33  |
| 0.17  | -0.26 | 0.17  | -0.08 |
| 0.20  | -0.26 | 0.14  | -0.08 |
| -0.14 | 0.42  | -0.14 | -0.14 |
| -0.14 | -0.14 | -0.14 | 0.42  |
| 0.24  | -0.07 | -0.25 | 0.08  |
| -0.25 | 0.24  | -0.07 | 0.08  |
| 0.36  | -0.18 | 0.00  | -0.18 |
| 0.12  | -0.21 | 0.30  | -0.21 |
| 0.12  | -0.21 | 0.30  | -0.21 |
| -0.14 | -0.14 | 0.42  | -0.14 |
| -0.04 | -0.04 | -0.22 | 0.30  |

=MinScore=5.6, MaxScore=6.7

\*\*\*\*\*

==== Training Set: =====

|    |      |                        |
|----|------|------------------------|
| 07 | 6.75 | accctatagtggctacagggt  |
| 06 | 6.64 | accttatagtagctacagggt  |
| 16 | 6.52 | accctgtagcaactacagggt  |
| 08 | 6.49 | accctatagtaactccagggt  |
| 09 | 6.45 | accttgtagtggcttcagggt  |
| 02 | 6.36 | actctatagtaactagagggt  |
| 11 | 6.32 | actctatagtaactatagagt  |
| 05 | 6.17 | actatgtagtgactacaagggt |
| 14 | 6.00 | accttggagtggcttcaagggt |
| 01 | 5.97 | actctatagtgactatagaga  |
| 13 | 5.94 | accttatagtagctataaggc  |
| 15 | 5.87 | accctgtaatgactacggagt  |
| 12 | 5.57 | accctggagcttcttcagggt  |

### CadR-PbrR-like

|       |       |       |       |
|-------|-------|-------|-------|
| a     | c     | g     | t     |
| 0.24  | 0.21  | -0.23 | -0.23 |
| 0.17  | -0.07 | -0.27 | 0.17  |
| -0.25 | 0.26  | 0.04  | -0.05 |
| -0.14 | 0.43  | -0.14 | -0.14 |
| -0.14 | -0.14 | -0.14 | 0.43  |
| 0.14  | 0.30  | -0.22 | -0.22 |
| -0.21 | 0.09  | -0.21 | 0.33  |
| 0.43  | -0.14 | -0.14 | -0.14 |
| -0.14 | -0.14 | 0.43  | -0.14 |
| -0.03 | -0.03 | -0.23 | 0.30  |

|       |       |       |       |
|-------|-------|-------|-------|
| -0.11 | 0.16  | 0.05  | -0.11 |
| 0.27  | -0.22 | 0.18  | -0.22 |
| -0.14 | 0.43  | -0.14 | -0.14 |
| -0.14 | -0.14 | -0.14 | 0.43  |
| 0.33  | -0.21 | 0.09  | -0.21 |
| -0.19 | -0.19 | 0.37  | 0.01  |
| 0.43  | -0.14 | -0.14 | -0.14 |
| -0.14 | -0.14 | 0.43  | -0.14 |
| 0.08  | 0.01  | 0.19  | -0.28 |
| 0.23  | -0.26 | -0.06 | 0.09  |
| 0.11  | 0.07  | -0.29 | 0.11  |

=MinScore=4.3, MaxScore=6.5

\*\*\*\*\*

===== Training Set: =====

|    |      |                       |
|----|------|-----------------------|
| 02 | 6.50 | aacctctagtcactagagcaa |
| 07 | 6.49 | ctcctctagtgactagaggac |
| 06 | 6.48 | ctcctatagtcactagaggaa |
| 09 | 6.38 | ctcctctagttactagaggat |
| 05 | 6.36 | aagctctagtcgctagaggaa |
| 10 | 6.33 | atcctctagtcgctagagatt |
| 01 | 6.17 | aagctctagtgactagagcaa |
| 08 | 6.06 | ctcctctagtcgctggagatt |
| 11 | 6.04 | aacctctagccactagagatc |
| 04 | 5.91 | aacctacagtagctagaggat |
| 03 | 4.31 | cctctacagagactgtagggc |

## HMRTR

### Gammaproteobacteria

| a     | c     | g     | t     |
|-------|-------|-------|-------|
| 0.40  | -0.13 | -0.13 | -0.13 |
| -0.13 | 0.40  | -0.13 | -0.13 |
| -0.20 | 0.23  | -0.20 | 0.18  |
| -0.20 | 0.18  | -0.20 | 0.23  |
| -0.13 | -0.13 | -0.13 | 0.40  |
| -0.01 | -0.23 | 0.25  | -0.01 |
| 0.04  | -0.18 | 0.33  | -0.18 |
| 0.40  | -0.13 | -0.13 | -0.13 |
| -0.18 | 0.04  | 0.33  | -0.18 |
| -0.18 | 0.04  | -0.18 | 0.33  |
| 0.08  | -0.03 | -0.24 | 0.19  |
| 0.18  | -0.20 | 0.23  | -0.20 |
| 0.33  | -0.18 | 0.04  | -0.18 |
| -0.13 | 0.40  | -0.13 | -0.13 |
| -0.13 | -0.13 | -0.13 | 0.40  |
| -0.13 | 0.40  | -0.13 | -0.13 |
| -0.18 | 0.33  | -0.18 | 0.04  |
| 0.40  | -0.13 | -0.13 | -0.13 |
| 0.28  | -0.20 | 0.12  | -0.20 |
| -0.01 | -0.01 | 0.25  | -0.23 |

```

-0.13  -0.13   0.40  -0.13
-0.13  -0.13  -0.13   0.40
=MinScore=6.3, MaxScore=7.2
*****
===== Traning Set: =====
      02   7.18 actctggagttgactccaaggt
      04   6.99 accttgaagttgactccaaggt
      05   6.94 accttggagttactctaaggt
      07   6.87 accttggagtaggctccaaggt
      01   6.55 actctggagtcgactccagagt
      03   6.43 accttagagctaactccaacgt
      06   6.31 actcttgactaaactccaggt

```

### Cyanobacteria

```

      a      c      g      t
0.40  -0.13  -0.13  -0.13
-0.13  0.40  -0.13  -0.13
-0.02  -0.02  -0.23  0.26
-0.18  0.33  -0.18  0.03
-0.13  -0.13  -0.13  0.40
0.05  0.16  0.05  -0.26
-0.21  0.21  -0.21  0.21
0.40  -0.13  -0.13  -0.13
-0.13  -0.13  0.40  -0.13
-0.13  -0.13  -0.13  0.40
-0.20  0.11  -0.20  0.29
0.21  -0.03  -0.24  0.06
0.25  -0.21  0.16  -0.21
-0.13  0.40  -0.13  -0.13
-0.13  -0.13  -0.13  0.40
0.21  -0.21  0.21  -0.21
-0.23  -0.02  0.26  -0.02
0.40  -0.13  -0.13  -0.13
-0.13  -0.13  0.40  -0.13
0.29  -0.20  0.11  -0.20
-0.03  0.06  0.21  -0.24
-0.13  -0.13  -0.13  0.40
=MinScore=5.9, MaxScore=7.1
*****
===== Traning Set: =====
      02   7.13 actctctagttactggagagt
      08   7.05 actctctagttagctggagagt
      03   7.05 actctctagttagctggagagt
      06   6.69 actctacagtctactagagagt
      04   6.69 actctgcagtcactagagact
      05   6.44 actctacagtttactacagact
      07   6.18 aactccagttcactggaggat
      01   5.89 accttgtagttagctataggt

```

### Actinobacteria

| a     | c     | g     | t     |
|-------|-------|-------|-------|
| 0.41  | -0.14 | -0.14 | -0.14 |
| -0.14 | 0.41  | -0.14 | -0.14 |
| 0.12  | 0.28  | -0.20 | -0.20 |
| -0.14 | -0.14 | -0.14 | 0.41  |
| -0.14 | -0.14 | -0.14 | 0.41  |
| -0.18 | 0.33  | 0.04  | -0.18 |
| -0.03 | 0.20  | -0.25 | 0.08  |
| 0.28  | 0.12  | -0.20 | -0.20 |
| -0.20 | 0.12  | 0.28  | -0.20 |
| -0.20 | 0.12  | -0.20 | 0.28  |
| -0.18 | 0.04  | 0.33  | -0.18 |
| -0.20 | 0.28  | -0.20 | 0.12  |
| 0.28  | -0.20 | 0.12  | -0.20 |
| -0.03 | 0.20  | 0.08  | -0.25 |
| -0.01 | -0.23 | -0.01 | 0.25  |
| -0.03 | -0.25 | 0.20  | 0.08  |
| -0.18 | 0.04  | 0.33  | -0.18 |
| 0.41  | -0.14 | -0.14 | -0.14 |
| 0.41  | -0.14 | -0.14 | -0.14 |
| -0.18 | 0.04  | 0.33  | -0.18 |
| -0.14 | -0.14 | 0.41  | -0.14 |
| -0.14 | -0.14 | -0.14 | 0.41  |

=MinScore=5.8, MaxScore=6.8

\*\*\*\*\*

===== Training Set: =====

|    |      |                        |
|----|------|------------------------|
| 01 | 6.82 | accttcccctgcactggaaggt |
| 07 | 6.79 | accttctagtgcactagaaggt |
| 06 | 6.59 | acattccagtgcgatggaaggt |
| 03 | 6.44 | acattccagtgtaggggaaggt |
| 05 | 6.36 | accttccccgcactggaacgt  |
| 02 | 6.18 | accttcaagcctacttgaaggt |
| 04 | 5.77 | accttgtagtgcggatcaaggt |
