# Supplementary material for: Identification of Position-Specific Correlations between DNA-Binding Domains and Their Binding Sites. Application to the MerR Family of Transcription Factors
Source: PubMed Central journal article supplement (PMC5045206; doi:10.1371/journal.pone.0162681), 2016-09-30

### Supporting material S3. Distribution of site percentages.

Horizontal axis shows percentage of sites from a given category from all sites found in the genome.  
Vertical axis shows number of such genomes.

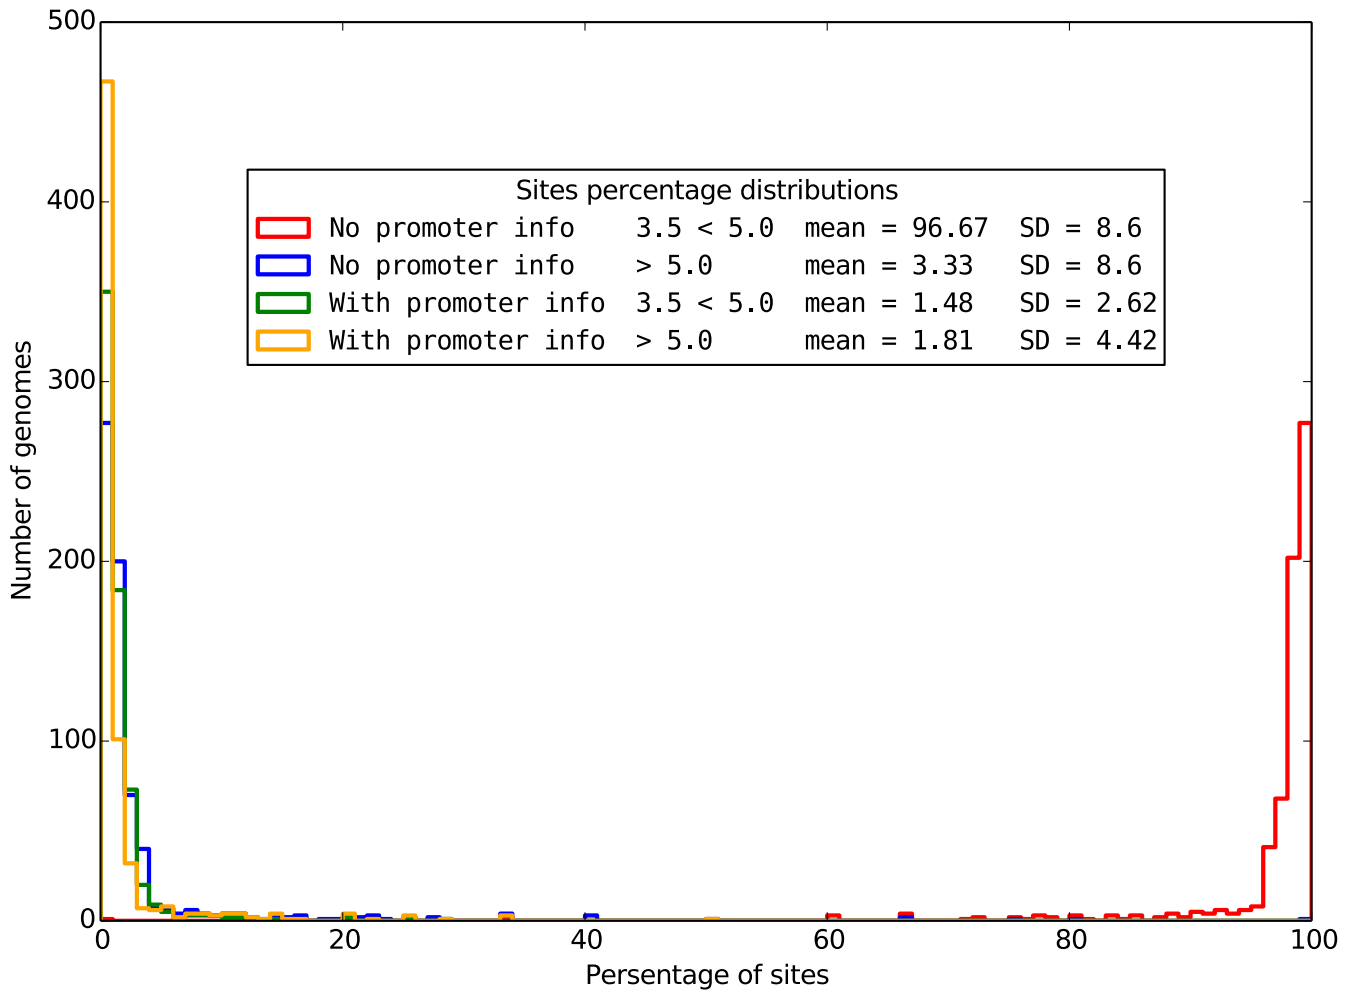

Supplement: pone.0162681.s003.pdf [file pone.0162681.s003.pdf]
