# Supplementary material for: Identification of Position-Specific Correlations between DNA-Binding Domains and Their Binding Sites. Application to the MerR Family of Transcription Factors
Source: PubMed Central journal article supplement (PMC5045206; doi:10.1371/journal.pone.0162681), 2016-09-30
Supplement: pone.0162681.s004.pdf [file pone.0162681.s004.pdf]

### Supporting material S4. List of Z-scores for pairs of positions.

# Full correlated list. Created: 13.10.2014

Columns: Nucleotides column index, amino acids column index, Z-score, mutual information, expected mutual information, sigma of mutual information

|    |    |       |          |          |          |
|----|----|-------|----------|----------|----------|
| 6  | 14 | 31.02 | 1.103033 | 0.128167 | 0.031423 |
| 13 | 14 | 30.09 | 1.061747 | 0.129968 | 0.030966 |
| 8  | 15 | 22.50 | 0.546506 | 0.070779 | 0.021141 |
| 11 | 15 | 21.92 | 0.551275 | 0.075133 | 0.021721 |
| 3  | 13 | 20.30 | 0.611765 | 0.101550 | 0.025136 |
| 5  | 14 | 18.56 | 0.686609 | 0.118735 | 0.030590 |
| 12 | 15 | 18.87 | 0.457632 | 0.106036 | 0.018629 |
| 6  | 15 | 16.29 | 0.427129 | 0.068825 | 0.021989 |
| 7  | 15 | 16.06 | 0.439740 | 0.105431 | 0.020813 |
| 16 | 13 | 16.62 | 0.565757 | 0.109679 | 0.027436 |
| 14 | 14 | 16.36 | 0.585798 | 0.114359 | 0.028811 |
| 6  | 21 | 14.95 | 0.520926 | 0.105781 | 0.027778 |
| 13 | 15 | 14.69 | 0.380233 | 0.063092 | 0.021591 |
| 13 | 21 | 14.74 | 0.507710 | 0.105615 | 0.027285 |
| 14 | 21 | 14.75 | 0.461903 | 0.098615 | 0.024632 |
| 7  | 5  | 12.74 | 0.318864 | 0.080589 | 0.018696 |
| 8  | 5  | 13.63 | 0.332646 | 0.062759 | 0.019800 |
| 12 | 5  | 13.90 | 0.312851 | 0.079392 | 0.016791 |
| 3  | 14 | 12.83 | 0.473258 | 0.103338 | 0.028834 |
| 12 | 14 | 13.68 | 0.432603 | 0.093986 | 0.024756 |
| 5  | 21 | 14.01 | 0.466253 | 0.103167 | 0.025911 |
| 13 | 5  | 12.57 | 0.314713 | 0.060183 | 0.020245 |
| 7  | 14 | 13.08 | 0.449479 | 0.096881 | 0.026967 |
| 16 | 14 | 12.52 | 0.496821 | 0.111671 | 0.030762 |
| 1  | 35 | 12.58 | 0.439968 | 0.106519 | 0.026507 |
| 6  | 5  | 11.50 | 0.299752 | 0.063098 | 0.020573 |
| 11 | 5  | 12.46 | 0.314878 | 0.065688 | 0.020003 |
| 6  | 13 | 12.06 | 0.469266 | 0.117646 | 0.029145 |
| 13 | 13 | 12.25 | 0.469321 | 0.116455 | 0.028815 |
| 8  | 18 | 12.89 | 0.286435 | 0.054934 | 0.017957 |
| 18 | 35 | 11.78 | 0.394032 | 0.090044 | 0.025811 |
| 8  | 69 | 11.68 | 0.574810 | 0.169712 | 0.034680 |
| 11 | 69 | 11.08 | 0.552907 | 0.169404 | 0.034613 |
| 7  | 13 | 9.98  | 0.345571 | 0.097493 | 0.024853 |
| 11 | 12 | 10.93 | 0.424125 | 0.112155 | 0.028544 |
| 11 | 18 | 9.84  | 0.238040 | 0.058751 | 0.018225 |
| 6  | 1  | 8.78  | 0.463859 | 0.166101 | 0.033903 |
| 13 | 1  | 9.53  | 0.486104 | 0.169011 | 0.033263 |
| 8  | 12 | 9.22  | 0.367147 | 0.110167 | 0.027878 |
| 13 | 16 | 8.75  | 0.134586 | 0.017802 | 0.013353 |
| 8  | 53 | 9.09  | 0.241712 | 0.061359 | 0.019844 |
| 6  | 69 | 9.05  | 0.523693 | 0.186465 | 0.037277 |
| 12 | 69 | 9.84  | 0.375080 | 0.114854 | 0.026457 |
| 7  | 1  | 7.69  | 0.344720 | 0.118323 | 0.029445 |
| 7  | 12 | 7.80  | 0.289789 | 0.100800 | 0.024218 |
| 6  | 12 | 8.78  | 0.381480 | 0.118728 | 0.029931 |
| 8  | 13 | 8.08  | 0.334585 | 0.110150 | 0.027776 |
| 8  | 14 | 7.61  | 0.344421 | 0.118379 | 0.029695 |

|    |    |      |          |          |          |
|----|----|------|----------|----------|----------|
| 11 | 14 | 8.51 | 0.375567 | 0.118848 | 0.030183 |
| 12 | 13 | 9.35 | 0.301732 | 0.092925 | 0.022334 |
| 13 | 12 | 8.40 | 0.364763 | 0.116378 | 0.029577 |
| 12 | 12 | 8.49 | 0.286205 | 0.096422 | 0.022356 |
| 8  | 22 | 7.93 | 0.367934 | 0.130799 | 0.029918 |
| 11 | 53 | 7.74 | 0.223687 | 0.064254 | 0.020608 |
| 7  | 69 | 8.72 | 0.368996 | 0.123644 | 0.028132 |
| 13 | 69 | 8.44 | 0.498454 | 0.188280 | 0.036758 |
| 3  | 1  | 6.49 | 0.318150 | 0.128685 | 0.029172 |
| 6  | 16 | 7.27 | 0.123248 | 0.023926 | 0.013664 |
| 4  | 20 | 7.35 | 0.240762 | 0.133231 | 0.014624 |
| 3  | 5  | 6.24 | 0.207959 | 0.088070 | 0.019210 |
| 12 | 1  | 6.27 | 0.285395 | 0.114793 | 0.027222 |
| 8  | 21 | 6.40 | 0.266725 | 0.099848 | 0.026079 |
| 6  | 53 | 6.19 | 0.190109 | 0.058774 | 0.021211 |
| 13 | 53 | 6.49 | 0.182038 | 0.054882 | 0.019596 |
| 8  | 59 | 6.96 | 0.236709 | 0.078517 | 0.022744 |
| 6  | 70 | 7.38 | 0.463624 | 0.193652 | 0.036593 |
| 3  | 69 | 6.66 | 0.313747 | 0.122606 | 0.028698 |
| 13 | 70 | 7.06 | 0.452235 | 0.197370 | 0.036115 |
| 8  | 1  | 5.14 | 0.314757 | 0.153332 | 0.031401 |
| 6  | 9  | 5.00 | 0.245232 | 0.106047 | 0.027841 |
| 16 | 1  | 5.98 | 0.335875 | 0.141637 | 0.032469 |
| 8  | 9  | 6.37 | 0.269170 | 0.100956 | 0.026410 |
| 6  | 11 | 6.59 | 0.223269 | 0.070352 | 0.023197 |
| 4  | 12 | 6.64 | 0.227026 | 0.095622 | 0.019799 |
| 16 | 5  | 5.78 | 0.198697 | 0.079059 | 0.020700 |
| 11 | 9  | 5.65 | 0.253135 | 0.103070 | 0.026575 |
| 13 | 9  | 5.63 | 0.258111 | 0.104084 | 0.027344 |
| 11 | 13 | 6.49 | 0.292599 | 0.111319 | 0.027939 |
| 6  | 22 | 5.44 | 0.317473 | 0.142132 | 0.032258 |
| 7  | 21 | 5.84 | 0.227187 | 0.091592 | 0.023218 |
| 16 | 15 | 5.30 | 0.217521 | 0.097757 | 0.022609 |
| 13 | 22 | 5.90 | 0.328583 | 0.141653 | 0.031679 |
| 4  | 31 | 6.45 | 0.248886 | 0.093828 | 0.024058 |
| 11 | 22 | 6.50 | 0.326560 | 0.131023 | 0.030075 |
| 15 | 20 | 5.42 | 0.217865 | 0.124442 | 0.017238 |
| 11 | 21 | 5.48 | 0.246840 | 0.100655 | 0.026683 |
| 12 | 21 | 5.27 | 0.199530 | 0.087197 | 0.021333 |
| 3  | 35 | 5.91 | 0.238844 | 0.102688 | 0.023044 |
| 4  | 35 | 5.88 | 0.229095 | 0.115067 | 0.019378 |
| 3  | 33 | 6.45 | 0.271534 | 0.105129 | 0.025806 |
| 2  | 35 | 6.15 | 0.236569 | 0.097575 | 0.022607 |
| 13 | 28 | 5.36 | 0.322670 | 0.155233 | 0.031236 |
| 11 | 33 | 4.81 | 0.234097 | 0.105160 | 0.026815 |
| 16 | 35 | 4.91 | 0.217939 | 0.097744 | 0.024471 |
| 6  | 44 | 4.98 | 0.333093 | 0.161085 | 0.034547 |
| 11 | 44 | 5.73 | 0.334138 | 0.145439 | 0.032959 |
| 16 | 33 | 4.72 | 0.240546 | 0.104501 | 0.028799 |
| 8  | 45 | 4.95 | 0.296191 | 0.143030 | 0.030953 |
| 8  | 44 | 5.34 | 0.318747 | 0.146384 | 0.032252 |
| 7  | 45 | 5.87 | 0.269007 | 0.098485 | 0.029072 |
| 13 | 56 | 4.97 | 0.109871 | 0.033327 | 0.015413 |
| 11 | 59 | 5.55 | 0.209350 | 0.080390 | 0.023227 |

|    |    |      |          |          |          |
|----|----|------|----------|----------|----------|
| 13 | 59 | 5.40 | 0.208837 | 0.079310 | 0.023988 |
| 6  | 0  | 3.66 | 0.235791 | 0.126441 | 0.029839 |
| 11 | 1  | 4.39 | 0.295981 | 0.152328 | 0.032739 |
| 13 | 0  | 4.41 | 0.256183 | 0.125945 | 0.029539 |
| 5  | 5  | 3.35 | 0.138300 | 0.071528 | 0.019939 |
| 3  | 11 | 3.85 | 0.161268 | 0.084463 | 0.019966 |
| 5  | 12 | 4.39 | 0.236051 | 0.111322 | 0.028400 |
| 8  | 11 | 4.19 | 0.158731 | 0.067913 | 0.021692 |
| 3  | 15 | 5.03 | 0.223190 | 0.115326 | 0.021423 |
| 11 | 11 | 4.28 | 0.164867 | 0.071025 | 0.021949 |
| 4  | 21 | 5.08 | 0.183195 | 0.087180 | 0.018892 |
| 6  | 18 | 5.08 | 0.149099 | 0.052471 | 0.019024 |
| 13 | 11 | 5.22 | 0.185093 | 0.067214 | 0.022574 |
| 15 | 12 | 6.06 | 0.243167 | 0.103764 | 0.022996 |
| 4  | 22 | 5.06 | 0.196338 | 0.089247 | 0.021146 |
| 16 | 12 | 4.07 | 0.225133 | 0.112340 | 0.027707 |
| 13 | 18 | 5.05 | 0.141842 | 0.047753 | 0.018629 |
| 12 | 18 | 6.04 | 0.177872 | 0.085200 | 0.015343 |
| 6  | 28 | 6.65 | 0.364095 | 0.149943 | 0.032207 |
| 13 | 25 | 4.55 | 0.122339 | 0.042249 | 0.017606 |
| 4  | 9  | 2.78 | 0.164958 | 0.110486 | 0.019593 |
| 2  | 13 | 3.54 | 0.194531 | 0.104339 | 0.025476 |
| 3  | 12 | 4.03 | 0.205985 | 0.104767 | 0.025116 |
| 15 | 30 | 3.65 | 0.191715 | 0.098503 | 0.025551 |
| 14 | 5  | 2.59 | 0.119602 | 0.070261 | 0.019034 |
| 4  | 14 | 3.29 | 0.165626 | 0.094359 | 0.021684 |
| 5  | 13 | 2.72 | 0.184625 | 0.109905 | 0.027514 |
| 7  | 11 | 3.69 | 0.150323 | 0.079608 | 0.019183 |
| 2  | 20 | 3.37 | 0.144904 | 0.085781 | 0.017548 |
| 7  | 18 | 3.64 | 0.145394 | 0.085083 | 0.016552 |
| 3  | 21 | 3.09 | 0.169287 | 0.097463 | 0.023268 |
| 15 | 14 | 2.84 | 0.173215 | 0.100152 | 0.025683 |
| 6  | 25 | 3.42 | 0.109312 | 0.045859 | 0.018578 |
| 4  | 27 | 3.42 | 0.167309 | 0.087914 | 0.023216 |
| 18 | 13 | 3.29 | 0.217161 | 0.119215 | 0.029762 |
| 4  | 30 | 3.51 | 0.182059 | 0.102983 | 0.022510 |
| 8  | 28 | 3.60 | 0.247148 | 0.137899 | 0.030329 |
| 6  | 45 | 3.32 | 0.265394 | 0.157745 | 0.032443 |
| 13 | 57 | 4.25 | 0.130826 | 0.048223 | 0.019432 |
| 8  | 42 | 3.19 | 0.219586 | 0.124810 | 0.029712 |
| 15 | 35 | 3.36 | 0.191922 | 0.113985 | 0.023176 |
| 6  | 49 | 3.82 | 0.086096 | 0.028915 | 0.014970 |
| 13 | 45 | 4.18 | 0.294844 | 0.161485 | 0.031929 |
| 13 | 44 | 4.96 | 0.332444 | 0.162259 | 0.034290 |
| 12 | 45 | 4.14 | 0.208662 | 0.096099 | 0.027184 |
| 4  | 53 | 4.61 | 0.196349 | 0.118895 | 0.016799 |
| 11 | 45 | 4.82 | 0.291661 | 0.140054 | 0.031482 |
| 8  | 63 | 4.07 | 0.230502 | 0.116962 | 0.027904 |
| 6  | 59 | 4.70 | 0.194622 | 0.081616 | 0.024058 |
| 4  | 72 | 4.49 | 0.198502 | 0.090933 | 0.023960 |
| 6  | 71 | 4.21 | 0.311447 | 0.164807 | 0.034845 |
| 7  | 70 | 4.40 | 0.245016 | 0.115704 | 0.029416 |
| 7  | 71 | 4.44 | 0.234544 | 0.114722 | 0.026980 |
| 4  | 69 | 4.65 | 0.199155 | 0.087373 | 0.024047 |

|    |    |      |          |          |          |
|----|----|------|----------|----------|----------|
| 13 | 62 | 4.65 | 0.170801 | 0.065692 | 0.022604 |
| 16 | 69 | 5.25 | 0.324762 | 0.151894 | 0.032951 |
| 13 | 71 | 4.72 | 0.331101 | 0.166638 | 0.034862 |
| 3  | 45 | 2.80 | 0.189227 | 0.104867 | 0.030095 |
| 19 | 35 | 3.13 | 0.163099 | 0.087800 | 0.024075 |
| 11 | 42 | 3.97 | 0.248218 | 0.126593 | 0.030636 |
| 17 | 35 | 3.55 | 0.182879 | 0.095426 | 0.024622 |
| 8  | 51 | 3.08 | 0.199204 | 0.113774 | 0.027734 |
| 6  | 51 | 3.62 | 0.228478 | 0.122009 | 0.029423 |
| 12 | 44 | 3.62 | 0.195920 | 0.102991 | 0.025697 |
| 6  | 57 | 3.63 | 0.125124 | 0.052529 | 0.019978 |
| 13 | 49 | 4.63 | 0.090629 | 0.024286 | 0.014344 |
| 6  | 56 | 4.19 | 0.104002 | 0.037846 | 0.015777 |
| 6  | 62 | 3.77 | 0.154326 | 0.067923 | 0.022892 |
| 8  | 71 | 3.58 | 0.265860 | 0.151224 | 0.032032 |
| 3  | 70 | 3.66 | 0.228449 | 0.117502 | 0.030337 |
| 13 | 68 | 3.78 | 0.213513 | 0.109761 | 0.027457 |
| 1  | 0  | 1.48 | 0.172142 | 0.125217 | 0.031686 |
| 1  | 1  | 1.98 | 0.220790 | 0.146880 | 0.037367 |
| 4  | 1  | 2.01 | 0.153505 | 0.105283 | 0.024025 |
| 1  | 12 | 2.15 | 0.192629 | 0.128389 | 0.029894 |
| 5  | 9  | 2.38 | 0.169621 | 0.105359 | 0.027026 |
| 2  | 14 | 3.05 | 0.194353 | 0.105893 | 0.029021 |
| 5  | 11 | 3.90 | 0.159495 | 0.074200 | 0.021883 |
| 17 | 13 | 2.47 | 0.184519 | 0.113853 | 0.028588 |
| 18 | 12 | 2.85 | 0.205905 | 0.121794 | 0.029478 |
| 12 | 22 | 2.65 | 0.162751 | 0.100529 | 0.023494 |
| 2  | 33 | 2.42 | 0.164294 | 0.100255 | 0.026482 |
| 8  | 25 | 2.79 | 0.095807 | 0.047466 | 0.017302 |
| 6  | 27 | 3.29 | 0.281776 | 0.166568 | 0.035014 |
| 13 | 20 | 2.77 | 0.088046 | 0.042046 | 0.016605 |
| 16 | 22 | 3.33 | 0.219694 | 0.123521 | 0.028849 |
| 18 | 20 | 4.17 | 0.126232 | 0.052015 | 0.017783 |
| 11 | 28 | 3.71 | 0.249479 | 0.134841 | 0.030862 |
| 15 | 21 | 2.96 | 0.158903 | 0.094225 | 0.021816 |
| 15 | 22 | 2.75 | 0.167000 | 0.099599 | 0.024539 |
| 16 | 21 | 2.84 | 0.175978 | 0.101871 | 0.026067 |
| 4  | 33 | 2.69 | 0.151511 | 0.097722 | 0.019994 |
| 8  | 35 | 2.67 | 0.146953 | 0.083846 | 0.023625 |
| 4  | 37 | 3.64 | 0.171116 | 0.089991 | 0.022287 |
| 8  | 33 | 3.73 | 0.204371 | 0.105565 | 0.026482 |
| 15 | 31 | 4.34 | 0.224701 | 0.100914 | 0.028503 |
| 12 | 28 | 2.63 | 0.162650 | 0.094814 | 0.025769 |
| 13 | 27 | 3.36 | 0.287051 | 0.168390 | 0.035276 |
| 6  | 34 | 2.38 | 0.119287 | 0.066987 | 0.021935 |
| 7  | 33 | 2.14 | 0.147288 | 0.092766 | 0.025445 |
| 13 | 33 | 2.72 | 0.187592 | 0.114344 | 0.026928 |
| 6  | 52 | 2.39 | 0.132145 | 0.076320 | 0.023328 |
| 5  | 53 | 2.67 | 0.125419 | 0.074754 | 0.018996 |
| 6  | 50 | 2.87 | 0.220075 | 0.131309 | 0.030890 |
| 13 | 50 | 3.23 | 0.232330 | 0.133311 | 0.030669 |
| 3  | 0  | 0.81 | 0.132204 | 0.109581 | 0.027805 |
| 2  | 1  | 0.95 | 0.160933 | 0.131910 | 0.030436 |
| 5  | 1  | 1.79 | 0.211055 | 0.153558 | 0.032083 |

|    |    |      |          |          |          |
|----|----|------|----------|----------|----------|
| 7  | 0  | 2.11 | 0.159637 | 0.103396 | 0.026660 |
| 2  | 5  | 1.87 | 0.116284 | 0.079727 | 0.019598 |
| 1  | 13 | 1.49 | 0.165460 | 0.120695 | 0.030100 |
| 2  | 12 | 1.51 | 0.145618 | 0.106402 | 0.026027 |
| 1  | 14 | 2.37 | 0.198321 | 0.122563 | 0.031921 |
| 4  | 13 | 1.49 | 0.122269 | 0.091845 | 0.020376 |
| 5  | 16 | 1.45 | 0.060148 | 0.040372 | 0.013682 |
| 12 | 9  | 1.96 | 0.141950 | 0.098839 | 0.021992 |
| 3  | 22 | 2.05 | 0.161891 | 0.106817 | 0.026889 |
| 5  | 22 | 2.92 | 0.213994 | 0.125824 | 0.030206 |
| 16 | 11 | 3.65 | 0.161656 | 0.080680 | 0.022169 |
| 14 | 12 | 4.02 | 0.217274 | 0.107769 | 0.027250 |
| 14 | 11 | 1.82 | 0.110628 | 0.072492 | 0.020937 |
| 14 | 13 | 2.50 | 0.173500 | 0.107274 | 0.026452 |
| 5  | 20 | 1.44 | 0.091925 | 0.066676 | 0.017499 |
| 8  | 16 | 2.17 | 0.057184 | 0.029205 | 0.012866 |
| 2  | 22 | 3.09 | 0.198874 | 0.114765 | 0.027240 |
| 11 | 16 | 1.47 | 0.052287 | 0.033296 | 0.012950 |
| 6  | 20 | 2.11 | 0.084654 | 0.047499 | 0.017643 |
| 8  | 0  | 0.38 | 0.129158 | 0.118294 | 0.028661 |
| 4  | 4  | 0.69 | 0.108718 | 0.093788 | 0.021607 |
| 11 | 0  | 0.74 | 0.140137 | 0.118495 | 0.029212 |
| 12 | 0  | 0.60 | 0.115193 | 0.100830 | 0.023974 |
| 16 | 0  | 1.13 | 0.148689 | 0.115499 | 0.029499 |
| 15 | 1  | 1.25 | 0.151039 | 0.115627 | 0.028356 |
| 18 | 1  | 1.67 | 0.223475 | 0.165328 | 0.034847 |
| 18 | 0  | 0.41 | 0.140153 | 0.127885 | 0.030082 |
| 19 | 1  | 1.05 | 0.179250 | 0.144366 | 0.033143 |
| 5  | 15 | 1.46 | 0.116540 | 0.084042 | 0.022320 |
| 14 | 9  | 1.77 | 0.149185 | 0.103682 | 0.025781 |
| 2  | 21 | 1.84 | 0.141855 | 0.096550 | 0.024608 |
| 12 | 11 | 2.72 | 0.126722 | 0.077658 | 0.018066 |
| 14 | 15 | 0.73 | 0.098981 | 0.083775 | 0.020757 |
| 7  | 22 | 1.45 | 0.143305 | 0.106748 | 0.025270 |
| 3  | 25 | 1.23 | 0.095195 | 0.075507 | 0.016023 |
| 15 | 13 | 1.51 | 0.133730 | 0.098313 | 0.023455 |
| 8  | 20 | 2.12 | 0.087563 | 0.051858 | 0.016857 |
| 3  | 28 | 1.50 | 0.149061 | 0.105002 | 0.029411 |
| 11 | 20 | 1.43 | 0.080812 | 0.055734 | 0.017534 |
| 5  | 25 | 2.03 | 0.090648 | 0.056007 | 0.017033 |
| 6  | 24 | 1.21 | 0.056410 | 0.036660 | 0.016345 |
| 3  | 27 | 1.19 | 0.147282 | 0.113273 | 0.028614 |
| 19 | 20 | 1.09 | 0.077383 | 0.058253 | 0.017550 |
| 5  | 34 | 1.82 | 0.111517 | 0.072166 | 0.021578 |
| 6  | 33 | 2.30 | 0.175522 | 0.111576 | 0.027836 |
| 11 | 25 | 2.07 | 0.085989 | 0.050003 | 0.017405 |
| 14 | 22 | 2.90 | 0.205300 | 0.122565 | 0.028565 |
| 4  | 32 | 1.47 | 0.120769 | 0.085346 | 0.024059 |
| 17 | 20 | 1.36 | 0.094662 | 0.069089 | 0.018799 |
| 11 | 35 | 1.64 | 0.126380 | 0.086390 | 0.024399 |
| 3  | 44 | 2.56 | 0.185421 | 0.111762 | 0.028822 |
| 13 | 34 | 2.45 | 0.118573 | 0.065615 | 0.021599 |
| 18 | 27 | 1.10 | 0.207376 | 0.168869 | 0.035145 |
| 7  | 62 | 2.00 | 0.120875 | 0.077609 | 0.021604 |

|    |    |      |          |          |          |
|----|----|------|----------|----------|----------|
| 11 | 58 | 2.64 | 0.183462 | 0.110633 | 0.027577 |
| 8  | 61 | 2.36 | 0.146354 | 0.088808 | 0.024417 |
| 5  | 59 | 2.65 | 0.143819 | 0.082061 | 0.023309 |
| 13 | 51 | 2.64 | 0.198657 | 0.121193 | 0.029345 |
| 13 | 52 | 2.84 | 0.138017 | 0.074154 | 0.022520 |
| 8  | 57 | 3.38 | 0.118083 | 0.054264 | 0.018884 |
| 8  | 58 | 3.45 | 0.203650 | 0.110430 | 0.027052 |
| 8  | 70 | 3.73 | 0.304058 | 0.175495 | 0.034448 |
| 11 | 34 | 0.97 | 0.087452 | 0.066578 | 0.021600 |
| 12 | 33 | 1.73 | 0.131734 | 0.091862 | 0.022988 |
| 7  | 44 | 2.16 | 0.169421 | 0.109018 | 0.027953 |
| 13 | 35 | 1.65 | 0.121871 | 0.081888 | 0.024281 |
| 8  | 46 | 1.97 | 0.071754 | 0.040043 | 0.016117 |
| 5  | 49 | 2.06 | 0.075597 | 0.044480 | 0.015080 |
| 15 | 37 | 1.99 | 0.152751 | 0.103892 | 0.024501 |
| 13 | 38 | 0.59 | 0.014833 | 0.009144 | 0.009648 |
| 18 | 33 | 1.48 | 0.152153 | 0.110847 | 0.027900 |
| 16 | 34 | 2.11 | 0.122747 | 0.074663 | 0.022762 |
| 5  | 45 | 0.90 | 0.166396 | 0.138349 | 0.031310 |
| 13 | 37 | 0.99 | 0.198566 | 0.164277 | 0.034611 |
| 17 | 33 | 1.13 | 0.137167 | 0.104600 | 0.028871 |
| 5  | 44 | 0.66 | 0.163145 | 0.141429 | 0.032680 |
| 14 | 35 | 0.93 | 0.110752 | 0.089429 | 0.022869 |
| 15 | 34 | 0.92 | 0.106711 | 0.088444 | 0.019848 |
| 11 | 46 | 1.43 | 0.066659 | 0.043095 | 0.016455 |
| 14 | 49 | 1.80 | 0.070046 | 0.045003 | 0.013929 |
| 8  | 55 | 2.52 | 0.151745 | 0.089317 | 0.024808 |
| 2  | 61 | 1.92 | 0.136008 | 0.089872 | 0.024058 |
| 5  | 56 | 2.64 | 0.092745 | 0.051846 | 0.015487 |
| 11 | 57 | 3.31 | 0.122572 | 0.057335 | 0.019723 |
| 11 | 52 | 1.32 | 0.106210 | 0.077244 | 0.021997 |
| 1  | 61 | 2.19 | 0.156081 | 0.095217 | 0.027729 |
| 8  | 54 | 1.36 | 0.193261 | 0.149631 | 0.032017 |
| 11 | 51 | 1.87 | 0.166642 | 0.114197 | 0.028062 |
| 5  | 57 | 1.25 | 0.089631 | 0.065639 | 0.019261 |
| 13 | 48 | 1.78 | 0.083640 | 0.050271 | 0.018769 |
| 16 | 45 | 2.09 | 0.189330 | 0.122412 | 0.032007 |
| 6  | 55 | 2.27 | 0.155015 | 0.095600 | 0.026120 |
| 16 | 44 | 1.27 | 0.173610 | 0.131960 | 0.032848 |
| 8  | 52 | 1.81 | 0.115639 | 0.075492 | 0.022156 |
| 13 | 55 | 1.53 | 0.135647 | 0.096545 | 0.025539 |
| 16 | 55 | 1.42 | 0.124145 | 0.086241 | 0.026637 |
| 12 | 59 | 1.88 | 0.117307 | 0.080774 | 0.019395 |
| 2  | 69 | 1.94 | 0.196110 | 0.137630 | 0.030221 |
| 11 | 54 | 1.69 | 0.204476 | 0.149411 | 0.032553 |
| 14 | 62 | 2.18 | 0.119004 | 0.072147 | 0.021506 |
| 6  | 73 | 1.92 | 0.229095 | 0.162828 | 0.034532 |
| 11 | 68 | 1.80 | 0.148825 | 0.100731 | 0.026706 |
| 14 | 59 | 2.74 | 0.140226 | 0.080779 | 0.021724 |
| 3  | 71 | 3.31 | 0.210163 | 0.116319 | 0.028337 |
| 11 | 63 | 2.99 | 0.200481 | 0.116820 | 0.027934 |
| 6  | 68 | 2.99 | 0.192543 | 0.108831 | 0.028034 |
| 5  | 69 | 3.34 | 0.275878 | 0.160973 | 0.034422 |
| 4  | 71 | 2.94 | 0.156975 | 0.089127 | 0.023059 |

|    |    |       |          |          |          |
|----|----|-------|----------|----------|----------|
| 15 | 69 | 2.63  | 0.174367 | 0.103671 | 0.026894 |
| 16 | 71 | 2.45  | 0.216837 | 0.138072 | 0.032112 |
| 11 | 70 | 2.71  | 0.265977 | 0.171765 | 0.034827 |
| 8  | 72 | 3.38  | 0.280553 | 0.165503 | 0.034017 |
| 12 | 71 | 4.13  | 0.213544 | 0.107956 | 0.025563 |
| 11 | 72 | 4.08  | 0.304040 | 0.163708 | 0.034403 |
| 14 | 69 | 3.80  | 0.279659 | 0.154931 | 0.032814 |
| 12 | 70 | 3.82  | 0.215950 | 0.110047 | 0.027689 |
| 11 | 71 | 2.81  | 0.243434 | 0.151381 | 0.032808 |
| 11 | 61 | 1.45  | 0.125116 | 0.089411 | 0.024606 |
| 1  | 3  | -0.62 | 0.067395 | 0.082133 | 0.023713 |
| 5  | 0  | 0.15  | 0.123716 | 0.119190 | 0.029266 |
| 1  | 4  | 0.10  | 0.128413 | 0.125245 | 0.031821 |
| 3  | 9  | 0.23  | 0.114503 | 0.108642 | 0.025316 |
| 0  | 14 | 0.11  | 0.097646 | 0.094919 | 0.023950 |
| 8  | 6  | -0.11 | 0.070726 | 0.073094 | 0.020888 |
| 14 | 1  | 0.56  | 0.164573 | 0.147310 | 0.030859 |
| 2  | 27 | 0.08  | 0.127529 | 0.125203 | 0.029533 |
| 7  | 28 | 0.94  | 0.124679 | 0.097621 | 0.028937 |
| 2  | 30 | 0.95  | 0.113053 | 0.089613 | 0.024611 |
| 7  | 25 | 1.89  | 0.098979 | 0.069240 | 0.015739 |
| 5  | 28 | 0.73  | 0.157971 | 0.135399 | 0.031131 |
| 18 | 18 | 0.21  | 0.061243 | 0.057242 | 0.018807 |
| 12 | 25 | 1.01  | 0.083453 | 0.068438 | 0.014871 |
| 13 | 24 | 1.80  | 0.061552 | 0.032693 | 0.016065 |
| 3  | 34 | 1.09  | 0.103835 | 0.080988 | 0.020960 |
| 15 | 27 | 1.40  | 0.137883 | 0.100572 | 0.026735 |
| 8  | 34 | 1.63  | 0.100112 | 0.065474 | 0.021257 |
| 15 | 28 | 0.86  | 0.115910 | 0.092278 | 0.027389 |
| 4  | 39 | 1.04  | 0.103765 | 0.081602 | 0.021234 |
| 6  | 37 | 1.42  | 0.214133 | 0.164616 | 0.034867 |
| 16 | 27 | 0.55  | 0.154197 | 0.136408 | 0.032182 |
| 18 | 22 | 0.64  | 0.164941 | 0.144844 | 0.031523 |
| 5  | 35 | 0.90  | 0.111844 | 0.090275 | 0.024004 |
| 16 | 25 | 1.33  | 0.088930 | 0.065108 | 0.017866 |
| 19 | 22 | 0.82  | 0.154953 | 0.131225 | 0.029110 |
| 6  | 35 | 1.24  | 0.116843 | 0.086013 | 0.024857 |
| 16 | 28 | 0.79  | 0.144405 | 0.119065 | 0.032130 |
| 17 | 28 | -0.58 | 0.110424 | 0.129364 | 0.032556 |
| 8  | 37 | 0.09  | 0.154218 | 0.151427 | 0.032573 |
| 18 | 51 | 0.41  | 0.135978 | 0.123914 | 0.029584 |
| 8  | 62 | 0.94  | 0.086765 | 0.066140 | 0.021830 |
| 12 | 58 | 0.70  | 0.110529 | 0.093542 | 0.024295 |
| 14 | 56 | 0.49  | 0.059653 | 0.052542 | 0.014658 |
| 1  | 69 | 0.87  | 0.206338 | 0.174491 | 0.036767 |
| 18 | 57 | 1.40  | 0.085388 | 0.056560 | 0.020614 |
| 13 | 72 | 1.52  | 0.237906 | 0.183017 | 0.036086 |
| 15 | 72 | 1.41  | 0.143266 | 0.104706 | 0.027340 |
| 15 | 71 | 1.56  | 0.141808 | 0.101778 | 0.025681 |
| 16 | 70 | 2.03  | 0.216040 | 0.147793 | 0.033593 |
| 3  | 42 | -0.61 | 0.094124 | 0.110763 | 0.027409 |
| 13 | 58 | 0.39  | 0.131205 | 0.120386 | 0.027842 |
| 19 | 52 | 1.17  | 0.102984 | 0.076594 | 0.022609 |
| 14 | 57 | 0.83  | 0.079973 | 0.064683 | 0.018322 |

|    |    |       |          |          |          |
|----|----|-------|----------|----------|----------|
| 6  | 58 | 0.73  | 0.139727 | 0.118733 | 0.028943 |
| 3  | 61 | 1.28  | 0.125649 | 0.094853 | 0.024038 |
| 8  | 56 | 2.03  | 0.072068 | 0.041163 | 0.015243 |
| 0  | 0  | -1.65 | 0.071475 | 0.111321 | 0.024136 |
| 0  | 1  | -1.42 | 0.065650 | 0.102880 | 0.026183 |
| 2  | 0  | -1.03 | 0.081968 | 0.110188 | 0.027351 |
| 1  | 2  | -0.94 | 0.076691 | 0.099557 | 0.024360 |
| 4  | 0  | -1.39 | 0.075835 | 0.106773 | 0.022215 |
| 4  | 5  | -0.96 | 0.084871 | 0.099495 | 0.015243 |
| 6  | 4  | -0.69 | 0.115725 | 0.137267 | 0.031012 |
| 8  | 3  | 0.00  | 0.069773 | 0.069682 | 0.021532 |
| 7  | 4  | -0.83 | 0.078436 | 0.100961 | 0.027027 |
| 2  | 9  | -0.72 | 0.086926 | 0.104954 | 0.025178 |
| 4  | 8  | -0.48 | 0.077164 | 0.088426 | 0.023283 |
| 13 | 6  | -0.67 | 0.055607 | 0.069588 | 0.020724 |
| 17 | 1  | -0.73 | 0.125062 | 0.149588 | 0.033760 |
| 8  | 10 | -0.33 | 0.079749 | 0.087533 | 0.023642 |
| 16 | 4  | 0.00  | 0.116580 | 0.116556 | 0.030425 |
| 19 | 4  | 0.07  | 0.123771 | 0.121670 | 0.028491 |
| 13 | 10 | 0.30  | 0.101180 | 0.093846 | 0.024703 |
| 18 | 5  | 0.65  | 0.080837 | 0.066870 | 0.021496 |
| 18 | 4  | 0.53  | 0.153613 | 0.137606 | 0.030324 |
| 17 | 5  | 0.21  | 0.078470 | 0.074027 | 0.020918 |
| 16 | 9  | 1.18  | 0.140850 | 0.108560 | 0.027373 |
| 14 | 31 | -0.71 | 0.111939 | 0.133095 | 0.029991 |
| 8  | 43 | -0.61 | 0.103406 | 0.121280 | 0.029285 |
| 12 | 39 | -0.41 | 0.083850 | 0.093576 | 0.023730 |
| 7  | 57 | 0.14  | 0.083046 | 0.080379 | 0.018800 |
| 3  | 62 | 0.49  | 0.095676 | 0.084750 | 0.022407 |
| 15 | 50 | 0.39  | 0.111218 | 0.100995 | 0.026097 |
| 19 | 46 | 0.65  | 0.056029 | 0.045297 | 0.016397 |
| 16 | 50 | 1.02  | 0.144431 | 0.113086 | 0.030684 |
| 7  | 59 | 1.41  | 0.111990 | 0.082316 | 0.021105 |
| 15 | 51 | 0.69  | 0.117660 | 0.100870 | 0.024195 |
| 5  | 62 | 1.44  | 0.105612 | 0.072704 | 0.022797 |
| 4  | 63 | 0.97  | 0.105956 | 0.085444 | 0.021065 |
| 6  | 61 | 1.03  | 0.119459 | 0.093278 | 0.025443 |
| 11 | 56 | 1.99  | 0.076527 | 0.045059 | 0.015830 |
| 5  | 71 | 0.84  | 0.173939 | 0.146378 | 0.032736 |
| 14 | 37 | -0.87 | 0.113300 | 0.139802 | 0.030334 |
| 5  | 46 | 0.02  | 0.049901 | 0.049489 | 0.016679 |
| 4  | 44 | 0.12  | 0.087645 | 0.084901 | 0.022502 |
| 6  | 42 | 0.61  | 0.154265 | 0.134852 | 0.031667 |
| 5  | 50 | 0.86  | 0.147514 | 0.121604 | 0.030099 |
| 19 | 34 | 0.85  | 0.084613 | 0.066174 | 0.021619 |
| 5  | 43 | -0.42 | 0.103840 | 0.116453 | 0.029790 |
| 13 | 42 | 0.54  | 0.152188 | 0.135399 | 0.031038 |
| 11 | 37 | -0.57 | 0.132831 | 0.151479 | 0.032588 |
| 17 | 31 | -0.78 | 0.109882 | 0.135575 | 0.033002 |
| 15 | 33 | 0.15  | 0.105458 | 0.101822 | 0.023471 |
| 16 | 39 | -0.79 | 0.094139 | 0.116856 | 0.028718 |
| 1  | 51 | 0.12  | 0.128660 | 0.125074 | 0.029615 |
| 14 | 45 | 0.88  | 0.159352 | 0.132970 | 0.029893 |
| 8  | 50 | 0.55  | 0.137550 | 0.121561 | 0.029086 |



|    |    |       |          |          |          |
|----|----|-------|----------|----------|----------|
| 3  | 55 | 1.20  | 0.115348 | 0.084670 | 0.025662 |
| 11 | 41 | -0.58 | 0.107487 | 0.123903 | 0.028451 |
| 18 | 34 | -0.72 | 0.052874 | 0.069097 | 0.022436 |
| 11 | 48 | -0.34 | 0.046681 | 0.053617 | 0.020381 |
| 15 | 44 | -0.66 | 0.080820 | 0.097916 | 0.025864 |
| 13 | 46 | 0.12  | 0.035629 | 0.033661 | 0.016273 |
| 1  | 58 | 0.46  | 0.124284 | 0.109732 | 0.031438 |
| 7  | 50 | 0.10  | 0.100982 | 0.098134 | 0.027569 |
| 5  | 52 | 0.91  | 0.105304 | 0.085098 | 0.022207 |
| 13 | 43 | 0.09  | 0.138316 | 0.135491 | 0.030710 |
| 5  | 51 | 0.87  | 0.137039 | 0.112247 | 0.028561 |
| 5  | 58 | -0.17 | 0.108432 | 0.113203 | 0.028311 |
| 12 | 51 | 0.44  | 0.105740 | 0.095710 | 0.022977 |
| 7  | 56 | -0.08 | 0.070478 | 0.071648 | 0.014713 |
| 0  | 4  | -1.99 | 0.045992 | 0.092596 | 0.023376 |
| 2  | 4  | -1.11 | 0.078963 | 0.110071 | 0.028143 |
| 1  | 5  | -1.13 | 0.057021 | 0.082418 | 0.022498 |
| 3  | 4  | -0.91 | 0.081193 | 0.106544 | 0.027784 |
| 13 | 8  | -1.04 | 0.117261 | 0.150228 | 0.031806 |
| 3  | 18 | -0.53 | 0.082980 | 0.092372 | 0.017715 |
| 14 | 10 | -0.23 | 0.078931 | 0.084237 | 0.022959 |
| 3  | 26 | -1.00 | 0.077725 | 0.107190 | 0.029558 |
| 18 | 11 | -0.74 | 0.056356 | 0.073475 | 0.023149 |
| 17 | 12 | -0.71 | 0.097253 | 0.117486 | 0.028312 |
| 19 | 9  | -0.65 | 0.085661 | 0.102637 | 0.026135 |
| 1  | 27 | -0.81 | 0.128054 | 0.156422 | 0.034812 |
| 17 | 11 | -0.50 | 0.067486 | 0.078938 | 0.023130 |
| 1  | 30 | -0.80 | 0.048194 | 0.074762 | 0.033296 |
| 17 | 14 | -0.27 | 0.110283 | 0.118783 | 0.030932 |
| 5  | 26 | -1.03 | 0.111557 | 0.145339 | 0.032843 |
| 19 | 12 | -0.41 | 0.101522 | 0.112745 | 0.027197 |
| 14 | 16 | -0.01 | 0.041257 | 0.041337 | 0.012815 |
| 13 | 17 | -0.15 | 0.010842 | 0.012248 | 0.009238 |
| 18 | 16 | -0.49 | 0.023230 | 0.029958 | 0.013835 |
| 7  | 27 | -0.32 | 0.103890 | 0.112751 | 0.027484 |
| 3  | 31 | -0.34 | 0.101338 | 0.111718 | 0.030156 |
| 14 | 20 | 0.57  | 0.076743 | 0.067221 | 0.016643 |
| 1  | 33 | -0.36 | 0.088249 | 0.099689 | 0.031906 |
| 0  | 35 | 0.25  | 0.132325 | 0.127187 | 0.020401 |
| 8  | 27 | -0.26 | 0.143924 | 0.152328 | 0.032335 |
| 18 | 14 | 0.64  | 0.149849 | 0.129969 | 0.031100 |
| 16 | 16 | 0.30  | 0.060491 | 0.056482 | 0.013298 |
| 4  | 28 | 0.08  | 0.086896 | 0.084997 | 0.023272 |
| 17 | 15 | -0.28 | 0.083211 | 0.089466 | 0.022490 |
| 13 | 19 | 0.14  | 0.007207 | 0.006174 | 0.007646 |
| 18 | 15 | 0.55  | 0.086743 | 0.074575 | 0.021984 |
| 2  | 31 | 0.96  | 0.145415 | 0.116249 | 0.030435 |
| 4  | 34 | 0.54  | 0.098862 | 0.089769 | 0.016744 |
| 14 | 25 | 0.97  | 0.071487 | 0.055529 | 0.016429 |
| 13 | 26 | -1.00 | 0.141057 | 0.175433 | 0.034386 |
| 2  | 2  | -2.29 | 0.048583 | 0.100469 | 0.022695 |
| 3  | 3  | -1.47 | 0.052319 | 0.083210 | 0.021032 |
| 5  | 2  | -1.64 | 0.050423 | 0.089755 | 0.023965 |
| 0  | 7  | -1.73 | 0.044126 | 0.086109 | 0.024246 |

|    |    |       |          |          |          |
|----|----|-------|----------|----------|----------|
| 1  | 6  | -1.10 | 0.052784 | 0.084800 | 0.029231 |
| 0  | 8  | -1.35 | 0.054392 | 0.086657 | 0.023951 |
| 5  | 3  | -2.10 | 0.028166 | 0.074819 | 0.022207 |
| 6  | 2  | -1.25 | 0.049105 | 0.077549 | 0.022714 |
| 1  | 7  | -2.23 | 0.055462 | 0.130584 | 0.033746 |
| 2  | 6  | -2.24 | 0.046563 | 0.095384 | 0.021830 |
| 9  | 0  | -2.21 | 0.047669 | 0.106591 | 0.026689 |
| 1  | 8  | -2.19 | 0.059718 | 0.135732 | 0.034715 |
| 6  | 3  | -1.59 | 0.036567 | 0.071806 | 0.022142 |
| 5  | 4  | -1.12 | 0.093014 | 0.126057 | 0.029595 |
| 7  | 3  | -1.80 | 0.039570 | 0.076398 | 0.020452 |
| 8  | 2  | -1.42 | 0.046723 | 0.078535 | 0.022417 |
| 1  | 9  | -1.44 | 0.075872 | 0.117651 | 0.029053 |
| 4  | 7  | -1.65 | 0.050365 | 0.087749 | 0.022644 |
| 8  | 4  | -1.29 | 0.089399 | 0.127245 | 0.029387 |
| 1  | 11 | -0.81 | 0.068147 | 0.087186 | 0.023565 |
| 6  | 6  | -0.86 | 0.052622 | 0.071765 | 0.022213 |
| 14 | 0  | -1.32 | 0.079359 | 0.115804 | 0.027707 |
| 11 | 3  | -0.77 | 0.054344 | 0.071206 | 0.021915 |
| 13 | 2  | -0.84 | 0.055935 | 0.074631 | 0.022183 |
| 4  | 11 | -0.63 | 0.079850 | 0.089977 | 0.016049 |
| 5  | 10 | -0.97 | 0.061470 | 0.085218 | 0.024493 |
| 17 | 0  | -0.82 | 0.096262 | 0.120342 | 0.029475 |
| 13 | 4  | -0.49 | 0.125368 | 0.140145 | 0.030073 |
| 2  | 15 | -0.37 | 0.093516 | 0.101448 | 0.021427 |
| 8  | 8  | -0.30 | 0.127679 | 0.136930 | 0.030612 |
| 7  | 9  | 0.15  | 0.105526 | 0.101872 | 0.024339 |
| 6  | 10 | -0.11 | 0.091243 | 0.093878 | 0.024709 |
| 15 | 4  | 0.11  | 0.103573 | 0.100807 | 0.025799 |
| 9  | 10 | -2.05 | 0.031744 | 0.077015 | 0.022036 |
| 10 | 8  | -2.29 | 0.052400 | 0.119681 | 0.029413 |
| 9  | 13 | -1.50 | 0.062556 | 0.099756 | 0.024806 |
| 19 | 6  | -1.11 | 0.044192 | 0.071488 | 0.024520 |
| 15 | 9  | -0.37 | 0.105336 | 0.114096 | 0.023769 |
| 18 | 6  | -0.81 | 0.054314 | 0.073322 | 0.023378 |
| 19 | 5  | -1.17 | 0.043369 | 0.066764 | 0.020015 |
| 18 | 9  | -0.22 | 0.103288 | 0.109471 | 0.028360 |
| 1  | 28 | -2.06 | 0.051072 | 0.123039 | 0.034936 |
| 6  | 23 | -1.73 | 0.053964 | 0.098006 | 0.025407 |
| 5  | 24 | -1.30 | 0.027145 | 0.048916 | 0.016804 |
| 19 | 10 | -2.14 | 0.038709 | 0.087862 | 0.022975 |
| 0  | 29 | -2.21 | 0.033265 | 0.080942 | 0.021583 |
| 12 | 16 | -1.62 | 0.049655 | 0.067687 | 0.011155 |
| 0  | 28 | -1.55 | 0.038364 | 0.078985 | 0.026224 |
| 9  | 22 | -2.20 | 0.052801 | 0.110150 | 0.026033 |
| 8  | 23 | -2.20 | 0.037310 | 0.091227 | 0.024532 |
| 2  | 29 | -1.36 | 0.090904 | 0.128112 | 0.027322 |
| 2  | 28 | -0.41 | 0.098681 | 0.110966 | 0.029861 |
| 2  | 32 | -1.44 | 0.084307 | 0.128768 | 0.030781 |
| 5  | 30 | -0.52 | 0.085998 | 0.097916 | 0.022840 |
| 19 | 16 | -0.84 | 0.027597 | 0.038232 | 0.012606 |
| 17 | 18 | -0.96 | 0.052491 | 0.070528 | 0.018869 |
| 3  | 29 | -0.81 | 0.091633 | 0.112587 | 0.025730 |
| 19 | 14 | -0.21 | 0.110100 | 0.116038 | 0.028525 |

|    |    |       |          |          |          |
|----|----|-------|----------|----------|----------|
| 7  | 26 | 0.00  | 0.109348 | 0.109296 | 0.027668 |
| 8  | 30 | 0.11  | 0.089344 | 0.086645 | 0.023628 |
| 3  | 32 | -1.95 | 0.058357 | 0.116911 | 0.030099 |
| 1  | 34 | -0.96 | 0.052356 | 0.076173 | 0.024908 |
| 6  | 29 | -0.92 | 0.134942 | 0.166138 | 0.034054 |
| 6  | 26 | -1.01 | 0.138025 | 0.172585 | 0.034281 |
| 8  | 24 | -0.55 | 0.030495 | 0.039182 | 0.015864 |
| 5  | 27 | -0.03 | 0.143413 | 0.144477 | 0.032530 |
| 3  | 30 | -1.22 | 0.070798 | 0.100125 | 0.023972 |
| 17 | 16 | -0.64 | 0.038561 | 0.047225 | 0.013479 |
| 4  | 29 | -0.91 | 0.061958 | 0.081259 | 0.021317 |
| 10 | 28 | -1.14 | 0.076877 | 0.112319 | 0.030960 |
| 12 | 26 | -1.38 | 0.068389 | 0.103562 | 0.025424 |
| 17 | 22 | -0.41 | 0.120638 | 0.132777 | 0.029955 |
| 1  | 37 | -1.56 | 0.108978 | 0.162729 | 0.034539 |
| 2  | 37 | -1.47 | 0.088665 | 0.130118 | 0.028265 |
| 12 | 27 | -0.65 | 0.090130 | 0.106714 | 0.025689 |
| 8  | 31 | 0.01  | 0.141353 | 0.140885 | 0.031421 |
| 18 | 21 | -1.01 | 0.078758 | 0.107501 | 0.028538 |
| 6  | 30 | -0.51 | 0.077646 | 0.090296 | 0.024630 |
| 5  | 31 | -0.68 | 0.116658 | 0.138180 | 0.031516 |
| 16 | 20 | -0.02 | 0.079558 | 0.079967 | 0.018946 |
| 2  | 34 | -0.93 | 0.055228 | 0.074747 | 0.021017 |
| 6  | 31 | -0.54 | 0.136285 | 0.154204 | 0.033237 |
| 14 | 28 | -0.58 | 0.113226 | 0.130274 | 0.029507 |
| 7  | 35 | 0.11  | 0.098389 | 0.095859 | 0.022189 |
| 11 | 31 | -0.54 | 0.122723 | 0.139756 | 0.031584 |
| 14 | 26 | -0.90 | 0.113620 | 0.141478 | 0.031098 |
| 3  | 37 | -0.34 | 0.109027 | 0.117956 | 0.026403 |
| 19 | 21 | -0.87 | 0.074875 | 0.097800 | 0.026269 |
| 11 | 30 | -0.23 | 0.080120 | 0.085867 | 0.025347 |
| 14 | 27 | 0.22  | 0.147233 | 0.140222 | 0.031313 |
| 2  | 39 | -0.85 | 0.085767 | 0.108684 | 0.026908 |
| 2  | 44 | -0.51 | 0.105894 | 0.121284 | 0.029938 |
| 4  | 42 | -0.54 | 0.086650 | 0.098464 | 0.021880 |
| 17 | 30 | 0.13  | 0.089520 | 0.086005 | 0.027317 |
| 12 | 34 | -0.91 | 0.056030 | 0.072820 | 0.018400 |
| 16 | 23 | -2.01 | 0.034152 | 0.085259 | 0.025380 |
| 7  | 32 | -1.21 | 0.078128 | 0.113636 | 0.029257 |
| 13 | 23 | -1.16 | 0.069953 | 0.099296 | 0.025375 |
| 19 | 18 | -1.62 | 0.033735 | 0.062228 | 0.017607 |
| 8  | 29 | -1.47 | 0.105685 | 0.152348 | 0.031697 |
| 17 | 25 | -0.89 | 0.043171 | 0.059566 | 0.018501 |
| 13 | 29 | -1.35 | 0.118970 | 0.166174 | 0.034921 |
| 13 | 30 | -0.47 | 0.081583 | 0.092327 | 0.022643 |
| 18 | 25 | -0.19 | 0.045886 | 0.049475 | 0.018747 |
| 8  | 39 | -1.04 | 0.096628 | 0.126625 | 0.028798 |
| 5  | 42 | -0.56 | 0.108701 | 0.125383 | 0.029857 |
| 12 | 35 | -0.35 | 0.088339 | 0.095369 | 0.020170 |
| 16 | 31 | -0.51 | 0.109677 | 0.126055 | 0.032113 |
| 15 | 32 | 0.45  | 0.110425 | 0.097831 | 0.027797 |
| 8  | 36 | -1.91 | 0.013276 | 0.037353 | 0.012631 |
| 17 | 27 | -1.20 | 0.110883 | 0.150112 | 0.032791 |
| 6  | 38 | -0.69 | 0.010546 | 0.017212 | 0.009633 |

|    |    |       |          |          |          |
|----|----|-------|----------|----------|----------|
| 13 | 31 | -0.40 | 0.144223 | 0.157425 | 0.032689 |
| 4  | 47 | -0.91 | 0.062205 | 0.082876 | 0.022722 |
| 17 | 34 | -0.91 | 0.051280 | 0.072274 | 0.023084 |
| 7  | 43 | -0.56 | 0.073660 | 0.088450 | 0.026457 |
| 11 | 39 | -0.61 | 0.107897 | 0.125677 | 0.029297 |
| 18 | 37 | -0.91 | 0.134419 | 0.166429 | 0.035181 |
| 8  | 47 | -0.03 | 0.141484 | 0.142498 | 0.031414 |
| 3  | 52 | -0.15 | 0.096184 | 0.099377 | 0.021687 |
| 2  | 53 | 0.74  | 0.102393 | 0.087748 | 0.019763 |
| 4  | 51 | 0.05  | 0.096617 | 0.095591 | 0.020847 |
| 6  | 48 | 0.99  | 0.071500 | 0.051587 | 0.020156 |
| 11 | 43 | -0.12 | 0.116430 | 0.120045 | 0.029626 |
| 12 | 42 | -0.40 | 0.091722 | 0.101383 | 0.024360 |
| 3  | 51 | -0.12 | 0.099159 | 0.102272 | 0.025954 |
| 13 | 41 | -0.09 | 0.127939 | 0.130784 | 0.030839 |
| 5  | 48 | -0.03 | 0.062631 | 0.063265 | 0.019510 |
| 3  | 50 | -0.08 | 0.102683 | 0.104981 | 0.028492 |
| 6  | 46 | 0.47  | 0.045823 | 0.037887 | 0.016715 |
| 7  | 63 | -1.21 | 0.066761 | 0.095990 | 0.024131 |
| 5  | 65 | -1.25 | 0.038122 | 0.064682 | 0.021307 |
| 15 | 55 | -1.01 | 0.062664 | 0.087658 | 0.024666 |
| 18 | 52 | -0.71 | 0.061652 | 0.078347 | 0.023460 |
| 12 | 53 | -0.59 | 0.078754 | 0.089228 | 0.017882 |
| 14 | 51 | 0.04  | 0.111647 | 0.110608 | 0.027401 |
| 5  | 61 | 0.19  | 0.098906 | 0.094220 | 0.024661 |
| 3  | 73 | 0.37  | 0.130178 | 0.120103 | 0.027240 |
| 6  | 60 | -0.81 | 0.114711 | 0.140403 | 0.031852 |
| 14 | 53 | 0.04  | 0.074313 | 0.073589 | 0.018548 |
| 11 | 65 | -0.10 | 0.058020 | 0.060075 | 0.020313 |
| 8  | 68 | 0.79  | 0.122277 | 0.101211 | 0.026654 |
| 19 | 57 | 1.45  | 0.088448 | 0.059215 | 0.020217 |
| 16 | 60 | 0.34  | 0.127280 | 0.117130 | 0.029423 |
| 4  | 73 | 1.04  | 0.115122 | 0.091660 | 0.022532 |
| 5  | 72 | 0.38  | 0.169307 | 0.156600 | 0.033460 |
| 16 | 61 | 0.75  | 0.112149 | 0.092536 | 0.026314 |
| 6  | 72 | 1.64  | 0.239851 | 0.180630 | 0.036185 |
| 16 | 62 | 1.01  | 0.102012 | 0.078242 | 0.023492 |
| 7  | 72 | -0.34 | 0.109768 | 0.119543 | 0.028558 |
| 18 | 61 | -0.21 | 0.089419 | 0.094787 | 0.026068 |
| 12 | 61 | 0.42  | 0.094113 | 0.085224 | 0.021131 |
| 16 | 57 | 1.12  | 0.099160 | 0.076004 | 0.020592 |
| 13 | 61 | 1.37  | 0.126801 | 0.092999 | 0.024609 |
| 18 | 56 | 1.00  | 0.058581 | 0.042595 | 0.015913 |
| 14 | 71 | -0.01 | 0.139889 | 0.140323 | 0.031396 |
| 11 | 73 | -0.03 | 0.149154 | 0.149997 | 0.032321 |
| 14 | 70 | 0.86  | 0.186974 | 0.158708 | 0.032870 |
| 13 | 66 | -1.06 | 0.054289 | 0.078143 | 0.022544 |
| 14 | 58 | -0.52 | 0.095736 | 0.109605 | 0.026642 |
| 2  | 71 | 0.46  | 0.140427 | 0.126973 | 0.029354 |
| 17 | 55 | -0.60 | 0.073560 | 0.089966 | 0.027327 |
| 19 | 53 | 0.38  | 0.070825 | 0.062496 | 0.022206 |
| 16 | 56 | 0.34  | 0.069273 | 0.063731 | 0.016249 |
| 18 | 55 | -0.78 | 0.076165 | 0.096410 | 0.025873 |
| 5  | 68 | -0.12 | 0.097943 | 0.101092 | 0.027292 |

|    |    |       |          |          |          |
|----|----|-------|----------|----------|----------|
| 2  | 72 | -0.50 | 0.119575 | 0.134629 | 0.029967 |
| 4  | 70 | -0.61 | 0.065976 | 0.081135 | 0.025054 |
| 14 | 60 | -0.39 | 0.107713 | 0.119320 | 0.029589 |
| 3  | 72 | 0.38  | 0.132620 | 0.121371 | 0.029429 |
| 5  | 70 | 0.91  | 0.195940 | 0.164719 | 0.034166 |
| 8  | 67 | -0.12 | 0.136465 | 0.140194 | 0.031094 |
| 19 | 56 | 0.84  | 0.060337 | 0.047596 | 0.015086 |
| 12 | 72 | -0.51 | 0.099524 | 0.112959 | 0.026356 |
| 16 | 68 | -0.31 | 0.086006 | 0.094418 | 0.027500 |
| 18 | 69 | 0.47  | 0.205799 | 0.187889 | 0.037878 |
| 13 | 73 | 0.82  | 0.190999 | 0.162863 | 0.034110 |
| 8  | 73 | 0.72  | 0.173277 | 0.150175 | 0.032173 |
| 13 | 67 | 0.02  | 0.152523 | 0.151747 | 0.033107 |
| 9  | 35 | -2.25 | 0.044606 | 0.093650 | 0.021804 |
| 12 | 32 | -1.61 | 0.064528 | 0.107766 | 0.026876 |
| 3  | 41 | -1.20 | 0.075157 | 0.103061 | 0.023292 |
| 15 | 29 | -1.07 | 0.071729 | 0.096827 | 0.023554 |
| 17 | 42 | -1.30 | 0.086561 | 0.127531 | 0.031440 |
| 12 | 47 | -1.26 | 0.069148 | 0.100492 | 0.024929 |
| 4  | 55 | -1.31 | 0.061229 | 0.086909 | 0.019647 |
| 7  | 52 | -1.12 | 0.066096 | 0.089546 | 0.020942 |
| 5  | 54 | -0.74 | 0.119962 | 0.143568 | 0.031716 |
| 14 | 44 | -0.81 | 0.110980 | 0.136359 | 0.031369 |
| 16 | 42 | -0.14 | 0.116528 | 0.120873 | 0.030182 |
| 7  | 51 | 0.58  | 0.113276 | 0.098556 | 0.025240 |
| 11 | 47 | -0.66 | 0.121881 | 0.142307 | 0.031168 |
| 4  | 54 | -0.72 | 0.069461 | 0.085494 | 0.022175 |
| 1  | 57 | -0.90 | 0.056456 | 0.077414 | 0.023182 |
| 14 | 43 | -1.10 | 0.081863 | 0.112998 | 0.028238 |
| 8  | 48 | -0.18 | 0.048698 | 0.052048 | 0.019064 |
| 19 | 37 | -0.35 | 0.138909 | 0.150153 | 0.032200 |
| 7  | 49 | -0.45 | 0.058546 | 0.065290 | 0.014901 |
| 19 | 44 | -0.44 | 0.128007 | 0.141798 | 0.031675 |
| 3  | 60 | -0.65 | 0.081151 | 0.099148 | 0.027844 |
| 12 | 50 | -0.37 | 0.086665 | 0.095796 | 0.024551 |
| 7  | 55 | -0.61 | 0.062290 | 0.077286 | 0.024390 |
| 7  | 54 | -0.31 | 0.102155 | 0.110635 | 0.027732 |
| 10 | 51 | -0.70 | 0.088238 | 0.107101 | 0.027003 |
| 19 | 49 | 0.23  | 0.043023 | 0.039437 | 0.015322 |
| 7  | 61 | 0.58  | 0.099694 | 0.086349 | 0.023128 |
| 16 | 52 | 1.08  | 0.114566 | 0.089538 | 0.023105 |
| 15 | 53 | 1.27  | 0.140175 | 0.115395 | 0.019554 |
| 10 | 34 | -2.44 | 0.023775 | 0.077007 | 0.021795 |
| 5  | 40 | -2.26 | 0.069494 | 0.145791 | 0.033718 |
| 1  | 44 | -2.01 | 0.078069 | 0.148709 | 0.035144 |
| 0  | 45 | -2.02 | 0.026363 | 0.079602 | 0.026340 |
| 2  | 43 | -1.77 | 0.048960 | 0.098638 | 0.028068 |
| 6  | 39 | -1.23 | 0.098682 | 0.136439 | 0.030686 |
| 13 | 32 | -2.18 | 0.107658 | 0.185423 | 0.035696 |
| 19 | 32 | -1.93 | 0.092367 | 0.156341 | 0.033200 |
| 1  | 49 | -1.30 | 0.034962 | 0.057868 | 0.017572 |
| 19 | 31 | -1.24 | 0.094378 | 0.133317 | 0.031451 |
| 19 | 30 | -0.98 | 0.047906 | 0.074966 | 0.027578 |
| 6  | 43 | -0.08 | 0.131110 | 0.133544 | 0.031132 |

|    |    |       |          |          |          |
|----|----|-------|----------|----------|----------|
| 1  | 48 | -1.38 | 0.025413 | 0.061340 | 0.025956 |
| 9  | 39 | -1.91 | 0.054851 | 0.104155 | 0.025770 |
| 2  | 46 | -1.51 | 0.038767 | 0.062736 | 0.015853 |
| 1  | 47 | -1.80 | 0.088050 | 0.147927 | 0.033310 |
| 16 | 32 | -1.31 | 0.097341 | 0.141231 | 0.033473 |
| 7  | 41 | -0.88 | 0.084244 | 0.104423 | 0.022866 |
| 14 | 34 | -1.00 | 0.050624 | 0.070745 | 0.020145 |
| 7  | 48 | -0.44 | 0.058923 | 0.068341 | 0.021175 |
| 9  | 46 | -1.64 | 0.034580 | 0.059965 | 0.015488 |
| 19 | 36 | -1.90 | 0.013870 | 0.044496 | 0.016084 |
| 1  | 54 | -1.13 | 0.111564 | 0.149898 | 0.033940 |
| 4  | 50 | -0.70 | 0.081324 | 0.096809 | 0.021970 |
| 15 | 39 | -0.96 | 0.069225 | 0.091902 | 0.023736 |
| 7  | 47 | -1.36 | 0.070031 | 0.105805 | 0.026347 |
| 18 | 36 | -1.67 | 0.009957 | 0.034772 | 0.014867 |
| 1  | 53 | -1.61 | 0.038571 | 0.081564 | 0.026769 |
| 0  | 54 | -1.73 | 0.041780 | 0.082366 | 0.023470 |
| 14 | 39 | -1.33 | 0.083199 | 0.119514 | 0.027407 |
| 2  | 50 | -0.75 | 0.085961 | 0.107344 | 0.028620 |
| 6  | 47 | -1.76 | 0.096871 | 0.156717 | 0.033970 |
| 1  | 52 | -1.34 | 0.056149 | 0.091061 | 0.025961 |
| 2  | 51 | -0.93 | 0.080882 | 0.105468 | 0.026382 |
| 12 | 41 | -0.78 | 0.080392 | 0.097360 | 0.021788 |
| 3  | 49 | -1.01 | 0.057773 | 0.073443 | 0.015484 |
| 0  | 3  | -3.52 | 0.036573 | 0.100241 | 0.018105 |
| 2  | 3  | -2.74 | 0.020864 | 0.078019 | 0.020890 |
| 3  | 2  | -2.94 | 0.042608 | 0.112585 | 0.023840 |
| 7  | 2  | -3.08 | 0.030890 | 0.101207 | 0.022846 |
| 2  | 7  | -2.14 | 0.051406 | 0.111311 | 0.028030 |
| 3  | 6  | -2.20 | 0.062979 | 0.109795 | 0.021270 |
| 10 | 0  | -2.25 | 0.047521 | 0.112657 | 0.029012 |
| 2  | 8  | -2.12 | 0.056007 | 0.117373 | 0.028891 |
| 9  | 1  | -2.47 | 0.054238 | 0.127385 | 0.029591 |
| 3  | 7  | -2.19 | 0.046084 | 0.105915 | 0.027286 |
| 0  | 10 | -2.88 | 0.020010 | 0.075131 | 0.019143 |
| 3  | 8  | -2.20 | 0.051665 | 0.112214 | 0.027484 |
| 5  | 8  | -2.86 | 0.047679 | 0.134937 | 0.030553 |
| 10 | 3  | -2.17 | 0.032756 | 0.080143 | 0.021839 |
| 9  | 4  | -2.02 | 0.052409 | 0.106520 | 0.026834 |
| 11 | 2  | -1.03 | 0.057862 | 0.081508 | 0.022920 |
| 0  | 13 | -1.90 | 0.053986 | 0.094760 | 0.021406 |
| 2  | 11 | -1.16 | 0.055935 | 0.079980 | 0.020729 |
| 6  | 7  | -2.24 | 0.069939 | 0.141029 | 0.031738 |
| 3  | 10 | -1.43 | 0.042795 | 0.076144 | 0.023381 |
| 7  | 6  | -2.74 | 0.031538 | 0.094163 | 0.022866 |
| 6  | 8  | -1.81 | 0.089685 | 0.148006 | 0.032300 |
| 10 | 4  | -2.46 | 0.041119 | 0.112196 | 0.028914 |
| 7  | 7  | -2.32 | 0.038432 | 0.100794 | 0.026894 |
| 4  | 10 | -2.33 | 0.029447 | 0.073578 | 0.018934 |
| 9  | 5  | -1.86 | 0.041265 | 0.076060 | 0.018719 |
| 15 | 0  | -1.83 | 0.062037 | 0.111022 | 0.026730 |
| 7  | 8  | -1.50 | 0.063599 | 0.105440 | 0.027859 |
| 11 | 4  | -0.81 | 0.103142 | 0.126848 | 0.029389 |
| 14 | 3  | -2.20 | 0.028091 | 0.074293 | 0.020964 |

|    |    |       |          |          |          |
|----|----|-------|----------|----------|----------|
| 1  | 16 | -2.07 | 0.031599 | 0.061440 | 0.014382 |
| 10 | 7  | -2.27 | 0.047756 | 0.113580 | 0.029054 |
| 7  | 10 | -1.42 | 0.042295 | 0.073524 | 0.021963 |
| 11 | 6  | -1.10 | 0.050649 | 0.075421 | 0.022473 |
| 13 | 3  | -1.75 | 0.031664 | 0.070073 | 0.021912 |
| 12 | 4  | -1.12 | 0.070150 | 0.097613 | 0.024481 |
| 1  | 15 | -1.76 | 0.062552 | 0.103810 | 0.023388 |
| 19 | 0  | -0.84 | 0.092560 | 0.116243 | 0.028353 |
| 11 | 8  | -0.59 | 0.117469 | 0.135969 | 0.031166 |
| 14 | 2  | -2.11 | 0.043871 | 0.089555 | 0.021680 |
| 15 | 3  | -2.72 | 0.037380 | 0.091419 | 0.019849 |
| 18 | 3  | -1.73 | 0.035603 | 0.074884 | 0.022668 |
| 17 | 4  | -0.78 | 0.100513 | 0.124653 | 0.030801 |
| 19 | 2  | -1.31 | 0.054852 | 0.083024 | 0.021586 |
| 9  | 12 | -1.53 | 0.063557 | 0.101438 | 0.024711 |
| 11 | 10 | -0.58 | 0.073230 | 0.087446 | 0.024398 |
| 2  | 16 | -2.83 | 0.026840 | 0.061510 | 0.012271 |
| 14 | 4  | -1.89 | 0.068579 | 0.121491 | 0.027969 |
| 16 | 2  | -2.31 | 0.039035 | 0.096621 | 0.024924 |
| 9  | 9  | -1.87 | 0.055819 | 0.101657 | 0.024497 |
| 11 | 7  | -2.11 | 0.064610 | 0.129835 | 0.030857 |
| 17 | 3  | -2.11 | 0.028272 | 0.076683 | 0.022989 |
| 18 | 2  | -1.71 | 0.043692 | 0.082911 | 0.022992 |
| 1  | 22 | -1.49 | 0.096045 | 0.142919 | 0.031485 |
| 3  | 20 | -0.91 | 0.084861 | 0.100992 | 0.017749 |
| 15 | 7  | -2.17 | 0.039369 | 0.095905 | 0.026009 |
| 1  | 21 | -1.52 | 0.063495 | 0.108379 | 0.029446 |
| 12 | 10 | -0.80 | 0.056015 | 0.072148 | 0.020282 |
| 16 | 6  | -1.68 | 0.052743 | 0.092794 | 0.023850 |
| 6  | 19 | -0.92 | 0.006478 | 0.014287 | 0.008504 |
| 2  | 23 | -0.93 | 0.059602 | 0.081710 | 0.023881 |
| 1  | 24 | -1.59 | 0.032340 | 0.062166 | 0.018705 |
| 10 | 14 | -1.52 | 0.061697 | 0.106965 | 0.029831 |
| 0  | 9  | -3.99 | 0.033682 | 0.118258 | 0.021183 |
| 4  | 6  | -3.70 | 0.056554 | 0.126748 | 0.018978 |
| 10 | 1  | -3.14 | 0.036236 | 0.135108 | 0.031502 |
| 9  | 2  | -3.16 | 0.027948 | 0.097457 | 0.022019 |
| 1  | 10 | -2.81 | 0.025634 | 0.093791 | 0.024298 |
| 5  | 6  | -2.68 | 0.032586 | 0.087333 | 0.020422 |
| 9  | 3  | -2.59 | 0.023076 | 0.075670 | 0.020271 |
| 5  | 7  | -2.13 | 0.063107 | 0.127833 | 0.030324 |
| 0  | 12 | -1.97 | 0.060789 | 0.101425 | 0.020680 |
| 10 | 2  | -3.16 | 0.027058 | 0.102041 | 0.023720 |
| 2  | 10 | -2.80 | 0.016035 | 0.078879 | 0.022447 |
| 12 | 2  | -3.36 | 0.035387 | 0.103730 | 0.020351 |
| 12 | 3  | -2.76 | 0.025812 | 0.076598 | 0.018368 |
| 8  | 7  | -2.59 | 0.050486 | 0.130064 | 0.030730 |
| 9  | 6  | -3.15 | 0.025483 | 0.091074 | 0.020826 |
| 10 | 5  | -3.29 | 0.017127 | 0.082083 | 0.019758 |
| 9  | 8  | -2.49 | 0.043987 | 0.112502 | 0.027549 |
| 9  | 7  | -2.69 | 0.033034 | 0.107716 | 0.027764 |
| 15 | 2  | -3.71 | 0.049407 | 0.132662 | 0.022452 |
| 10 | 6  | -3.09 | 0.029500 | 0.099153 | 0.022527 |
| 16 | 3  | -2.43 | 0.023408 | 0.078731 | 0.022770 |

|    |    |       |          |          |          |
|----|----|-------|----------|----------|----------|
| 3  | 16 | -1.75 | 0.049950 | 0.073181 | 0.013297 |
| 17 | 2  | -1.95 | 0.043892 | 0.091393 | 0.024323 |
| 10 | 9  | -2.41 | 0.044070 | 0.107651 | 0.026392 |
| 12 | 7  | -2.18 | 0.041865 | 0.096095 | 0.024893 |
| 1  | 18 | -1.47 | 0.052718 | 0.082310 | 0.020064 |
| 12 | 6  | -3.60 | 0.022375 | 0.095758 | 0.020406 |
| 14 | 7  | -2.61 | 0.047363 | 0.122775 | 0.028868 |
| 10 | 11 | -2.05 | 0.038325 | 0.082365 | 0.021500 |
| 0  | 21 | -3.37 | 0.021492 | 0.090721 | 0.020563 |
| 1  | 20 | -2.75 | 0.023149 | 0.079719 | 0.020558 |
| 12 | 8  | -1.78 | 0.055205 | 0.100586 | 0.025548 |
| 13 | 7  | -2.71 | 0.058482 | 0.142772 | 0.031050 |
| 2  | 18 | -2.47 | 0.037986 | 0.081775 | 0.017755 |
| 9  | 11 | -2.10 | 0.034579 | 0.075965 | 0.019718 |
| 10 | 10 | -2.39 | 0.023967 | 0.079773 | 0.023359 |
| 14 | 6  | -2.35 | 0.038481 | 0.085249 | 0.019881 |
| 15 | 5  | -1.46 | 0.072862 | 0.099097 | 0.017987 |
| 15 | 8  | -1.32 | 0.064960 | 0.099338 | 0.026136 |
| 9  | 14 | -2.67 | 0.028017 | 0.101918 | 0.027638 |
| 7  | 16 | -2.11 | 0.041806 | 0.067148 | 0.012025 |
| 0  | 23 | -2.62 | 0.027044 | 0.081263 | 0.020664 |
| 10 | 13 | -1.86 | 0.057330 | 0.105868 | 0.026153 |
| 16 | 7  | -1.82 | 0.065040 | 0.120320 | 0.030398 |
| 6  | 17 | -0.91 | 0.012277 | 0.020956 | 0.009519 |
| 5  | 18 | -2.46 | 0.021009 | 0.065772 | 0.018212 |
| 17 | 6  | -2.01 | 0.034247 | 0.083379 | 0.024424 |
| 19 | 3  | -1.56 | 0.038445 | 0.071414 | 0.021119 |
| 14 | 8  | -2.72 | 0.050241 | 0.129396 | 0.029127 |
| 0  | 22 | -2.09 | 0.044713 | 0.090860 | 0.022038 |
| 5  | 17 | -3.05 | 0.018005 | 0.048431 | 0.009984 |
| 10 | 12 | -2.79 | 0.034628 | 0.109439 | 0.026770 |
| 17 | 8  | -2.63 | 0.050158 | 0.135647 | 0.032518 |
| 19 | 8  | -2.22 | 0.060136 | 0.130340 | 0.031635 |
| 2  | 25 | -1.80 | 0.037343 | 0.067482 | 0.016776 |
| 8  | 19 | -2.00 | 0.007497 | 0.024404 | 0.008443 |
| 7  | 20 | -1.85 | 0.057569 | 0.089935 | 0.017476 |
| 1  | 25 | -1.00 | 0.047392 | 0.067837 | 0.020503 |
| 15 | 6  | -4.07 | 0.030267 | 0.121667 | 0.022475 |
| 9  | 16 | -3.31 | 0.018945 | 0.058460 | 0.011943 |
| 10 | 15 | -2.72 | 0.044494 | 0.104986 | 0.022251 |
| 18 | 7  | -2.64 | 0.054943 | 0.142154 | 0.033060 |
| 8  | 17 | -1.99 | 0.012109 | 0.030404 | 0.009192 |
| 15 | 10 | -2.36 | 0.023339 | 0.075847 | 0.022244 |
| 16 | 8  | -1.44 | 0.081696 | 0.126317 | 0.031047 |
| 1  | 23 | -2.42 | 0.027020 | 0.091325 | 0.026598 |
| 17 | 7  | -1.97 | 0.066642 | 0.128838 | 0.031544 |
| 9  | 15 | -3.63 | 0.025094 | 0.096952 | 0.019787 |
| 1  | 26 | -2.87 | 0.063064 | 0.157119 | 0.032800 |
| 4  | 23 | -2.88 | 0.025556 | 0.080631 | 0.019146 |
| 3  | 24 | -1.94 | 0.040828 | 0.073438 | 0.016794 |
| 0  | 27 | -1.23 | 0.056599 | 0.085707 | 0.023711 |
| 9  | 18 | -2.30 | 0.038739 | 0.077945 | 0.017028 |
| 17 | 10 | -2.11 | 0.037099 | 0.088272 | 0.024211 |
| 18 | 8  | -1.77 | 0.088762 | 0.147970 | 0.033471 |



|    |    |       |          |          |          |
|----|----|-------|----------|----------|----------|
| 17 | 9  | -1.34 | 0.072058 | 0.109538 | 0.028069 |
| 3  | 23 | -0.87 | 0.060167 | 0.081414 | 0.024431 |
| 0  | 26 | -2.39 | 0.020705 | 0.076305 | 0.023289 |
| 2  | 24 | -1.83 | 0.033637 | 0.063024 | 0.016090 |
| 19 | 7  | -2.30 | 0.054565 | 0.125320 | 0.030813 |
| 15 | 11 | -1.62 | 0.062192 | 0.092087 | 0.018505 |
| 16 | 10 | -1.25 | 0.053209 | 0.083103 | 0.023960 |
| 5  | 19 | -4.02 | 0.011165 | 0.043692 | 0.008094 |
| 10 | 16 | -3.94 | 0.013443 | 0.063866 | 0.012793 |
| 9  | 20 | -3.29 | 0.027368 | 0.082219 | 0.016652 |
| 2  | 26 | -2.32 | 0.053986 | 0.122054 | 0.029300 |
| 5  | 23 | -2.40 | 0.029409 | 0.090788 | 0.025526 |
| 10 | 18 | -2.37 | 0.040434 | 0.084566 | 0.018628 |
| 11 | 17 | -1.93 | 0.018983 | 0.037029 | 0.009336 |
| 18 | 10 | -1.62 | 0.055453 | 0.096150 | 0.025144 |
| 7  | 24 | -2.50 | 0.024752 | 0.065833 | 0.016421 |
| 0  | 31 | -2.33 | 0.029696 | 0.090582 | 0.026097 |
| 10 | 21 | -1.39 | 0.065010 | 0.100301 | 0.025404 |
| 7  | 23 | -1.80 | 0.032305 | 0.075085 | 0.023713 |
| 9  | 21 | -1.37 | 0.059946 | 0.092134 | 0.023534 |
| 19 | 11 | -2.39 | 0.021079 | 0.071956 | 0.021286 |
| 1  | 29 | -2.36 | 0.085482 | 0.165132 | 0.033703 |
| 19 | 15 | -1.57 | 0.046610 | 0.078957 | 0.020581 |
| 9  | 25 | -2.27 | 0.027675 | 0.063568 | 0.015778 |
| 8  | 26 | -1.68 | 0.102545 | 0.156867 | 0.032415 |
| 16 | 18 | -0.95 | 0.059660 | 0.077828 | 0.019106 |
| 11 | 23 | -2.13 | 0.037299 | 0.090685 | 0.025062 |
| 10 | 24 | -2.12 | 0.029244 | 0.065064 | 0.016914 |
| 10 | 29 | -2.66 | 0.056178 | 0.129187 | 0.027426 |
| 10 | 26 | -2.18 | 0.056996 | 0.122741 | 0.030107 |
| 12 | 24 | -2.63 | 0.028519 | 0.067469 | 0.014834 |
| 9  | 27 | -2.18 | 0.058357 | 0.120523 | 0.028522 |
| 7  | 29 | -1.74 | 0.072888 | 0.115642 | 0.024536 |
| 7  | 30 | -1.93 | 0.031079 | 0.081926 | 0.026409 |
| 9  | 28 | -2.48 | 0.037469 | 0.107721 | 0.028345 |
| 18 | 19 | -1.69 | 0.006168 | 0.022095 | 0.009452 |
| 11 | 26 | -2.06 | 0.088914 | 0.155667 | 0.032435 |
| 0  | 37 | -2.35 | 0.036679 | 0.090152 | 0.022752 |
| 14 | 23 | -2.04 | 0.041181 | 0.089057 | 0.023511 |
| 14 | 17 | -3.74 | 0.019339 | 0.051428 | 0.008577 |
| 0  | 30 | -3.16 | 0.026804 | 0.105632 | 0.024938 |
| 15 | 15 | -3.10 | 0.075960 | 0.139168 | 0.020370 |
| 11 | 19 | -2.48 | 0.008248 | 0.030521 | 0.008969 |
| 4  | 26 | -1.84 | 0.039190 | 0.081144 | 0.022861 |
| 10 | 20 | -3.66 | 0.021740 | 0.089008 | 0.018373 |
| 5  | 29 | -3.01 | 0.051388 | 0.143346 | 0.030522 |
| 10 | 25 | -2.49 | 0.027577 | 0.069620 | 0.016876 |
| 9  | 26 | -1.76 | 0.068728 | 0.118747 | 0.028385 |
| 12 | 23 | -1.83 | 0.036097 | 0.075996 | 0.021862 |
| 11 | 24 | -1.23 | 0.022279 | 0.042406 | 0.016419 |
| 18 | 17 | -2.44 | 0.007494 | 0.029539 | 0.009053 |
| 10 | 22 | -2.18 | 0.055533 | 0.116118 | 0.027733 |
| 9  | 23 | -2.31 | 0.026057 | 0.079764 | 0.023220 |
| 19 | 13 | -1.34 | 0.073087 | 0.110022 | 0.027482 |

|    |    |       |          |          |          |
|----|----|-------|----------|----------|----------|
| 14 | 18 | -1.12 | 0.046441 | 0.066037 | 0.017527 |
| 1  | 31 | -2.02 | 0.064400 | 0.133780 | 0.034425 |
| 0  | 32 | -2.16 | 0.023675 | 0.078041 | 0.025178 |
| 12 | 20 | -2.76 | 0.049318 | 0.092516 | 0.015668 |
| 10 | 23 | -2.16 | 0.028117 | 0.083016 | 0.025367 |
| 9  | 24 | -2.34 | 0.023669 | 0.060497 | 0.015706 |
| 1  | 32 | -2.46 | 0.066066 | 0.156181 | 0.036629 |
| 0  | 33 | -2.82 | 0.032264 | 0.098255 | 0.023361 |
| 19 | 19 | -2.79 | 0.008542 | 0.036524 | 0.010034 |
| 15 | 23 | -2.49 | 0.022930 | 0.081534 | 0.023512 |
| 14 | 24 | -1.52 | 0.025967 | 0.049678 | 0.015576 |
| 11 | 27 | -1.04 | 0.117326 | 0.151091 | 0.032514 |
| 7  | 31 | -2.00 | 0.046349 | 0.104711 | 0.029154 |
| 17 | 21 | -1.12 | 0.074009 | 0.104097 | 0.026897 |
| 5  | 33 | -0.84 | 0.089945 | 0.112017 | 0.026390 |
| 6  | 32 | -2.04 | 0.109162 | 0.181685 | 0.035589 |
| 9  | 29 | -1.91 | 0.070759 | 0.122278 | 0.027010 |
| 9  | 30 | -1.43 | 0.051735 | 0.086844 | 0.024579 |
| 0  | 39 | -2.44 | 0.025796 | 0.079194 | 0.021886 |
| 1  | 36 | -2.82 | 0.013552 | 0.068626 | 0.019533 |
| 10 | 27 | -2.64 | 0.047631 | 0.126861 | 0.030005 |
| 5  | 32 | -2.18 | 0.083936 | 0.156653 | 0.033362 |
| 12 | 30 | -2.23 | 0.031161 | 0.083960 | 0.023655 |
| 2  | 40 | -2.11 | 0.055206 | 0.120762 | 0.031053 |
| 3  | 39 | -1.71 | 0.060042 | 0.103266 | 0.025306 |
| 16 | 26 | -1.93 | 0.073026 | 0.134016 | 0.031665 |
| 5  | 37 | -1.35 | 0.102119 | 0.145078 | 0.031781 |
| 19 | 23 | -1.65 | 0.048626 | 0.088642 | 0.024270 |
| 18 | 24 | -0.94 | 0.025211 | 0.041137 | 0.017013 |
| 6  | 36 | -1.14 | 0.014212 | 0.029387 | 0.013285 |
| 0  | 42 | -2.65 | 0.038290 | 0.100900 | 0.023632 |
| 10 | 32 | -2.88 | 0.039522 | 0.130501 | 0.031583 |
| 1  | 41 | -2.59 | 0.061361 | 0.139285 | 0.030136 |
| 9  | 33 | -1.76 | 0.052552 | 0.097076 | 0.025265 |
| 3  | 40 | -1.96 | 0.049586 | 0.108039 | 0.029780 |
| 0  | 43 | -1.27 | 0.046142 | 0.074986 | 0.022798 |
| 17 | 26 | -2.37 | 0.073090 | 0.150837 | 0.032788 |
| 19 | 24 | -1.88 | 0.014163 | 0.045006 | 0.016437 |
| 1  | 42 | -1.22 | 0.092511 | 0.132976 | 0.033071 |
| 5  | 38 | -1.79 | 0.023375 | 0.041807 | 0.010298 |
| 12 | 31 | -1.42 | 0.064154 | 0.101806 | 0.026547 |
| 11 | 32 | -0.83 | 0.134479 | 0.162544 | 0.033849 |
| 2  | 41 | -1.60 | 0.072377 | 0.111913 | 0.024783 |
| 9  | 34 | -2.15 | 0.028341 | 0.071602 | 0.020098 |
| 7  | 34 | -1.20 | 0.047548 | 0.072760 | 0.020924 |
| 16 | 30 | -0.50 | 0.076956 | 0.090395 | 0.026695 |
| 10 | 33 | -2.24 | 0.041665 | 0.103673 | 0.027652 |
| 17 | 23 | -1.96 | 0.039793 | 0.090454 | 0.025858 |
| 16 | 24 | -1.92 | 0.026346 | 0.059788 | 0.017411 |
| 14 | 29 | -2.96 | 0.049804 | 0.138784 | 0.030057 |
| 10 | 30 | -2.13 | 0.039731 | 0.093462 | 0.025280 |
| 0  | 40 | -1.89 | 0.031499 | 0.076103 | 0.023562 |
| 1  | 39 | -2.48 | 0.046496 | 0.125785 | 0.031992 |
| 9  | 31 | -2.29 | 0.046425 | 0.112814 | 0.029024 |

|    |    |       |          |          |          |
|----|----|-------|----------|----------|----------|
| 8  | 32 | -1.31 | 0.121134 | 0.164800 | 0.033285 |
| 11 | 29 | -2.18 | 0.083138 | 0.152665 | 0.031956 |
| 1  | 40 | -2.91 | 0.054827 | 0.152229 | 0.033519 |
| 15 | 26 | -2.00 | 0.039764 | 0.093467 | 0.026816 |
| 17 | 24 | -1.13 | 0.033055 | 0.052676 | 0.017414 |
| 18 | 23 | -2.17 | 0.042684 | 0.099280 | 0.026043 |
| 1  | 45 | -2.06 | 0.058142 | 0.129118 | 0.034512 |
| 3  | 43 | -1.23 | 0.057420 | 0.092395 | 0.028512 |
| 7  | 39 | -0.26 | 0.091551 | 0.098208 | 0.025351 |
| 9  | 37 | -1.85 | 0.072425 | 0.124066 | 0.027853 |
| 19 | 27 | -1.20 | 0.110994 | 0.149013 | 0.031719 |
| 8  | 38 | -2.05 | 0.007431 | 0.025650 | 0.008873 |
| 6  | 41 | -1.19 | 0.096043 | 0.132435 | 0.030660 |
| 15 | 24 | -3.96 | 0.023372 | 0.091206 | 0.017121 |
| 17 | 19 | -3.68 | 0.012372 | 0.049927 | 0.010218 |
| 5  | 36 | -3.36 | 0.016380 | 0.055696 | 0.011710 |
| 10 | 31 | -2.84 | 0.030518 | 0.118308 | 0.030897 |
| 9  | 32 | -1.97 | 0.064876 | 0.124684 | 0.030408 |
| 12 | 29 | -1.87 | 0.062618 | 0.107344 | 0.023936 |
| 0  | 41 | -2.98 | 0.027325 | 0.085563 | 0.019511 |
| 6  | 40 | -2.24 | 0.092677 | 0.170774 | 0.034892 |
| 18 | 28 | -1.59 | 0.096743 | 0.148635 | 0.032538 |
| 14 | 32 | -2.98 | 0.055664 | 0.150764 | 0.031872 |
| 5  | 41 | -2.64 | 0.045363 | 0.118861 | 0.027875 |
| 17 | 29 | -2.56 | 0.070382 | 0.152852 | 0.032161 |
| 7  | 40 | -2.24 | 0.043055 | 0.107206 | 0.028630 |
| 19 | 28 | -1.88 | 0.069644 | 0.127542 | 0.030825 |
| 2  | 45 | -1.83 | 0.056083 | 0.111631 | 0.030324 |
| 4  | 43 | -2.59 | 0.023885 | 0.078215 | 0.020995 |
| 10 | 37 | -2.20 | 0.069459 | 0.132147 | 0.028485 |
| 1  | 46 | -1.90 | 0.026665 | 0.061841 | 0.018506 |
| 0  | 47 | -2.07 | 0.033331 | 0.081701 | 0.023358 |
| 11 | 36 | -2.15 | 0.012494 | 0.041533 | 0.013496 |
| 14 | 33 | -1.32 | 0.073111 | 0.106894 | 0.025583 |
| 18 | 29 | -1.54 | 0.114804 | 0.169383 | 0.035367 |
| 14 | 30 | -1.09 | 0.069393 | 0.094135 | 0.022748 |
| 1  | 43 | -0.65 | 0.099110 | 0.118916 | 0.030473 |
| 19 | 25 | -1.04 | 0.032974 | 0.051420 | 0.017721 |
| 4  | 40 | -2.11 | 0.033003 | 0.081890 | 0.023207 |
| 0  | 44 | -1.65 | 0.042810 | 0.082771 | 0.024173 |
| 5  | 39 | -1.20 | 0.089851 | 0.124168 | 0.028600 |
| 7  | 37 | -0.27 | 0.111668 | 0.118563 | 0.025562 |
| 2  | 42 | -1.14 | 0.082032 | 0.113471 | 0.027608 |
| 18 | 26 | -3.39 | 0.057305 | 0.174740 | 0.034638 |
| 19 | 26 | -3.21 | 0.053898 | 0.154090 | 0.031212 |
| 10 | 35 | -2.49 | 0.042157 | 0.099797 | 0.023152 |
| 4  | 41 | -2.39 | 0.036229 | 0.082876 | 0.019528 |
| 16 | 29 | -1.95 | 0.081651 | 0.139678 | 0.029717 |
| 3  | 48 | -1.79 | 0.044634 | 0.080601 | 0.020129 |
| 1  | 50 | -1.92 | 0.058766 | 0.121234 | 0.032492 |
| 2  | 49 | -1.98 | 0.032288 | 0.061421 | 0.014703 |
| 10 | 41 | -2.41 | 0.052146 | 0.113927 | 0.025605 |
| 2  | 48 | -2.00 | 0.028551 | 0.069252 | 0.020352 |
| 10 | 40 | -2.33 | 0.048577 | 0.121294 | 0.031271 |

|    |    |       |          |          |          |
|----|----|-------|----------|----------|----------|
| 4  | 45 | -1.57 | 0.047077 | 0.085377 | 0.024337 |
| 12 | 37 | -1.35 | 0.077245 | 0.110508 | 0.024582 |
| 7  | 42 | -0.99 | 0.079383 | 0.105550 | 0.026380 |
| 2  | 47 | -1.01 | 0.089058 | 0.118126 | 0.028900 |
| 13 | 36 | -0.59 | 0.015936 | 0.022758 | 0.011622 |
| 11 | 38 | -0.54 | 0.026418 | 0.031398 | 0.009182 |
| 18 | 31 | -0.75 | 0.128703 | 0.153836 | 0.033418 |
| 8  | 41 | -0.67 | 0.103470 | 0.122362 | 0.028364 |
| 18 | 30 | -0.99 | 0.060185 | 0.086696 | 0.026676 |
| 2  | 67 | -2.38 | 0.054442 | 0.120511 | 0.027733 |
| 19 | 50 | -1.65 | 0.068869 | 0.117044 | 0.029127 |
| 6  | 63 | -2.23 | 0.061000 | 0.125810 | 0.029059 |
| 14 | 55 | -1.47 | 0.053888 | 0.089625 | 0.024239 |
| 16 | 53 | -1.58 | 0.050167 | 0.084557 | 0.021791 |
| 15 | 54 | -1.54 | 0.060019 | 0.098813 | 0.025235 |
| 0  | 69 | -1.10 | 0.056906 | 0.084116 | 0.024669 |
| 12 | 57 | -0.24 | 0.076719 | 0.080726 | 0.016982 |
| 5  | 66 | -1.50 | 0.045235 | 0.080421 | 0.023496 |
| 18 | 53 | -0.67 | 0.046781 | 0.061494 | 0.021834 |
| 11 | 60 | -0.84 | 0.102382 | 0.128510 | 0.030951 |
| 16 | 48 | -1.25 | 0.038922 | 0.067156 | 0.022637 |
| 14 | 50 | -0.47 | 0.104265 | 0.117588 | 0.028179 |
| 11 | 40 | -3.42 | 0.041058 | 0.153044 | 0.032727 |
| 9  | 42 | -2.77 | 0.034384 | 0.109662 | 0.027211 |
| 0  | 51 | -3.07 | 0.032633 | 0.098261 | 0.021393 |
| 0  | 50 | -3.03 | 0.024270 | 0.096664 | 0.023897 |
| 4  | 46 | -2.45 | 0.059255 | 0.094110 | 0.014252 |
| 3  | 47 | -1.75 | 0.056938 | 0.105823 | 0.027945 |
| 18 | 32 | -2.11 | 0.103790 | 0.180639 | 0.036353 |
| 9  | 40 | -2.64 | 0.038295 | 0.117042 | 0.029873 |
| 10 | 39 | -2.58 | 0.039637 | 0.110812 | 0.027638 |
| 3  | 46 | -1.70 | 0.044482 | 0.072906 | 0.016702 |
| 17 | 32 | -2.58 | 0.067065 | 0.156764 | 0.034782 |
| 8  | 40 | -3.25 | 0.046500 | 0.153962 | 0.033080 |
| 19 | 29 | -2.39 | 0.077424 | 0.152762 | 0.031561 |
| 15 | 40 | -2.13 | 0.037129 | 0.094818 | 0.027056 |
| 10 | 45 | -1.77 | 0.058640 | 0.113193 | 0.030872 |
| 12 | 43 | -0.80 | 0.066749 | 0.085966 | 0.024051 |
| 0  | 55 | -2.68 | 0.029240 | 0.089302 | 0.022397 |
| 14 | 41 | -1.99 | 0.061247 | 0.115328 | 0.027129 |
| 14 | 40 | -1.79 | 0.083829 | 0.140650 | 0.031720 |
| 10 | 44 | -2.82 | 0.037001 | 0.123158 | 0.030530 |
| 9  | 45 | -2.02 | 0.051050 | 0.109074 | 0.028663 |
| 17 | 37 | -1.56 | 0.101402 | 0.152383 | 0.032623 |
| 2  | 52 | -2.80 | 0.030021 | 0.090188 | 0.021456 |
| 13 | 40 | -2.77 | 0.078473 | 0.173702 | 0.034440 |
| 9  | 44 | -1.79 | 0.064887 | 0.116414 | 0.028851 |
| 10 | 43 | -0.95 | 0.071625 | 0.099366 | 0.029162 |
| 16 | 37 | -1.87 | 0.083930 | 0.140920 | 0.030489 |
| 7  | 46 | -1.60 | 0.039429 | 0.065534 | 0.016327 |
| 17 | 36 | -2.49 | 0.019537 | 0.058368 | 0.015578 |
| 9  | 43 | -2.23 | 0.036010 | 0.096333 | 0.027001 |
| 13 | 39 | -1.70 | 0.086450 | 0.138407 | 0.030639 |
| 10 | 42 | -1.79 | 0.064547 | 0.115887 | 0.028731 |

|    |    |       |          |          |          |
|----|----|-------|----------|----------|----------|
| 5  | 47 | -1.26 | 0.096284 | 0.135986 | 0.031468 |
| 14 | 38 | -2.56 | 0.020409 | 0.044354 | 0.009349 |
| 19 | 33 | -1.60 | 0.054505 | 0.097760 | 0.027044 |
| 19 | 40 | -2.49 | 0.072360 | 0.150629 | 0.031496 |
| 16 | 43 | -1.73 | 0.055040 | 0.106195 | 0.029625 |
| 9  | 50 | -1.41 | 0.065539 | 0.103971 | 0.027272 |
| 16 | 47 | -1.72 | 0.075389 | 0.128648 | 0.030930 |
| 4  | 59 | -1.58 | 0.062200 | 0.090964 | 0.018213 |
| 3  | 59 | -0.83 | 0.068863 | 0.087267 | 0.022187 |
| 17 | 44 | -0.28 | 0.134764 | 0.144184 | 0.033722 |
| 11 | 50 | 0.41  | 0.133044 | 0.120884 | 0.029401 |
| 2  | 59 | -0.38 | 0.076432 | 0.084592 | 0.021267 |
| 12 | 48 | -0.81 | 0.055224 | 0.070424 | 0.018663 |
| 10 | 50 | -0.34 | 0.098897 | 0.108924 | 0.029715 |
| 10 | 53 | -2.02 | 0.051419 | 0.091581 | 0.019920 |
| 9  | 54 | -2.18 | 0.056668 | 0.118062 | 0.028152 |
| 14 | 48 | -1.65 | 0.031761 | 0.062215 | 0.018475 |
| 18 | 44 | -1.21 | 0.118284 | 0.161032 | 0.035246 |
| 17 | 45 | -1.26 | 0.092759 | 0.134150 | 0.032728 |
| 19 | 43 | -1.75 | 0.068818 | 0.118149 | 0.028166 |
| 10 | 49 | -3.22 | 0.014295 | 0.063713 | 0.015346 |
| 0  | 59 | -2.67 | 0.046856 | 0.098507 | 0.019356 |
| 18 | 41 | -1.87 | 0.076901 | 0.135227 | 0.031238 |
| 3  | 56 | -2.48 | 0.042513 | 0.078773 | 0.014632 |
| 2  | 57 | -2.44 | 0.032513 | 0.078778 | 0.018934 |
| 10 | 48 | -2.37 | 0.022315 | 0.071369 | 0.020673 |
| 18 | 40 | -3.31 | 0.055472 | 0.171804 | 0.035126 |
| 15 | 43 | -2.42 | 0.024695 | 0.085241 | 0.024988 |
| 19 | 39 | -1.81 | 0.068696 | 0.121314 | 0.029015 |
| 12 | 46 | -1.23 | 0.048397 | 0.066874 | 0.015012 |
| 0  | 58 | -2.24 | 0.049298 | 0.103516 | 0.024159 |
| 9  | 49 | -2.33 | 0.025405 | 0.058458 | 0.014184 |
| 17 | 41 | -2.04 | 0.069026 | 0.127896 | 0.028850 |
| 9  | 48 | -1.90 | 0.028653 | 0.066466 | 0.019934 |
| 2  | 56 | -3.00 | 0.022407 | 0.068172 | 0.015232 |
| 17 | 40 | -2.71 | 0.057658 | 0.148343 | 0.033454 |
| 18 | 39 | -2.09 | 0.071061 | 0.137279 | 0.031751 |
| 8  | 49 | -1.10 | 0.017324 | 0.032863 | 0.014159 |
| 15 | 42 | -0.81 | 0.085805 | 0.106126 | 0.025228 |
| 2  | 55 | -0.76 | 0.064417 | 0.083463 | 0.025139 |
| 10 | 47 | -2.40 | 0.048509 | 0.119316 | 0.029447 |
| 19 | 38 | -1.95 | 0.021008 | 0.038458 | 0.008930 |
| 3  | 54 | -1.07 | 0.082127 | 0.112578 | 0.028434 |
| 16 | 41 | -0.11 | 0.116602 | 0.119469 | 0.026871 |
| 1  | 56 | -1.87 | 0.033367 | 0.065849 | 0.017354 |
| 16 | 40 | -2.32 | 0.058308 | 0.132512 | 0.032046 |
| 17 | 39 | -2.35 | 0.054736 | 0.124870 | 0.029858 |
| 14 | 42 | -1.52 | 0.077791 | 0.120535 | 0.028206 |
| 10 | 46 | -2.61 | 0.021357 | 0.064903 | 0.016677 |
| 9  | 47 | -1.90 | 0.061402 | 0.113660 | 0.027508 |
| 1  | 55 | -1.67 | 0.042887 | 0.090082 | 0.028229 |
| 3  | 53 | -2.13 | 0.061547 | 0.101460 | 0.018754 |
| 18 | 38 | -1.66 | 0.008596 | 0.024898 | 0.009842 |
| 2  | 54 | -0.93 | 0.095343 | 0.123232 | 0.030070 |

|    |    |       |          |          |          |
|----|----|-------|----------|----------|----------|
| 15 | 41 | -2.21 | 0.047438 | 0.094934 | 0.021535 |
| 18 | 45 | -1.36 | 0.110735 | 0.155304 | 0.032860 |
| 1  | 62 | -1.26 | 0.051573 | 0.082350 | 0.024457 |
| 4  | 52 | -3.23 | 0.055025 | 0.109704 | 0.016946 |
| 15 | 48 | -2.72 | 0.034698 | 0.091293 | 0.020808 |
| 17 | 46 | -2.14 | 0.015522 | 0.052762 | 0.017390 |
| 0  | 63 | -3.20 | 0.018233 | 0.087057 | 0.021505 |
| 16 | 46 | -2.33 | 0.018915 | 0.059449 | 0.017364 |
| 15 | 47 | -1.68 | 0.051187 | 0.094150 | 0.025583 |
| 9  | 53 | -1.58 | 0.053011 | 0.083558 | 0.019296 |
| 2  | 60 | -1.39 | 0.069385 | 0.108547 | 0.028094 |
| 18 | 43 | -1.49 | 0.088287 | 0.133863 | 0.030602 |
| 15 | 46 | -1.12 | 0.069910 | 0.088604 | 0.016739 |
| 3  | 58 | -1.06 | 0.074582 | 0.103720 | 0.027538 |
| 15 | 45 | -1.44 | 0.051337 | 0.092629 | 0.028638 |
| 14 | 46 | -1.59 | 0.024930 | 0.049716 | 0.015545 |
| 2  | 58 | -1.04 | 0.072580 | 0.100726 | 0.026949 |
| 11 | 49 | -0.35 | 0.031205 | 0.036346 | 0.014565 |
| 18 | 42 | -1.27 | 0.095702 | 0.136599 | 0.032190 |
| 13 | 47 | -1.68 | 0.100805 | 0.157605 | 0.033815 |
| 5  | 55 | -0.79 | 0.070640 | 0.091351 | 0.026301 |
| 1  | 59 | -1.16 | 0.064467 | 0.093909 | 0.025319 |
| 7  | 53 | -0.84 | 0.071615 | 0.088618 | 0.020159 |
| 6  | 54 | -0.30 | 0.153610 | 0.163965 | 0.034462 |
| 9  | 51 | -1.75 | 0.057024 | 0.101368 | 0.025381 |
| 3  | 57 | -1.15 | 0.068258 | 0.089627 | 0.018660 |
| 18 | 50 | -1.07 | 0.099407 | 0.132766 | 0.031123 |
| 2  | 66 | -1.03 | 0.054096 | 0.076871 | 0.022195 |
| 17 | 51 | -0.53 | 0.101202 | 0.116744 | 0.029452 |
| 12 | 56 | -0.23 | 0.069793 | 0.072735 | 0.013022 |
| 8  | 60 | -0.18 | 0.122816 | 0.128121 | 0.030188 |
| 4  | 58 | -2.82 | 0.039148 | 0.101729 | 0.022166 |
| 10 | 52 | -2.87 | 0.028455 | 0.093867 | 0.022769 |
| 12 | 49 | -2.53 | 0.031699 | 0.066757 | 0.013843 |
| 19 | 42 | -1.66 | 0.074324 | 0.123025 | 0.029417 |
| 14 | 47 | -1.90 | 0.074535 | 0.131720 | 0.030051 |
| 0  | 61 | -1.81 | 0.063673 | 0.102337 | 0.021329 |
| 9  | 52 | -2.88 | 0.026002 | 0.086934 | 0.021129 |
| 10 | 59 | -2.63 | 0.028501 | 0.086678 | 0.022144 |
| 17 | 52 | -1.66 | 0.045269 | 0.084966 | 0.023905 |
| 3  | 66 | -1.04 | 0.057710 | 0.081738 | 0.023185 |
| 5  | 64 | -2.52 | 0.064155 | 0.145679 | 0.032340 |
| 1  | 68 | -1.87 | 0.046375 | 0.100802 | 0.029105 |
| 9  | 60 | -1.87 | 0.053877 | 0.103968 | 0.026821 |
| 0  | 70 | -1.68 | 0.029325 | 0.072912 | 0.025944 |
| 3  | 67 | -1.65 | 0.065167 | 0.108679 | 0.026309 |
| 9  | 61 | -2.36 | 0.032153 | 0.086613 | 0.023056 |
| 17 | 53 | -1.71 | 0.036969 | 0.074973 | 0.022281 |
| 16 | 54 | -1.10 | 0.098640 | 0.132874 | 0.031234 |
| 19 | 51 | -0.25 | 0.107243 | 0.114004 | 0.026951 |
| 6  | 64 | -1.53 | 0.114360 | 0.167469 | 0.034793 |
| 2  | 68 | -1.37 | 0.054620 | 0.089588 | 0.025474 |
| 10 | 60 | -1.85 | 0.055616 | 0.108402 | 0.028580 |
| 0  | 71 | -1.68 | 0.045835 | 0.087109 | 0.024521 |

|    |    |       |          |          |          |
|----|----|-------|----------|----------|----------|
| 10 | 61 | -2.60 | 0.028224 | 0.092196 | 0.024607 |
| 17 | 54 | -2.19 | 0.074748 | 0.146595 | 0.032820 |
| 3  | 68 | -1.40 | 0.050732 | 0.087233 | 0.025996 |
| 7  | 64 | -2.42 | 0.043527 | 0.111125 | 0.027967 |
| 19 | 45 | -1.77 | 0.078566 | 0.133394 | 0.030993 |
| 2  | 62 | -1.71 | 0.040812 | 0.077872 | 0.021734 |
| 18 | 46 | -1.09 | 0.023132 | 0.041723 | 0.017106 |
| 1  | 63 | -2.60 | 0.046426 | 0.124045 | 0.029806 |
| 9  | 55 | -1.72 | 0.039430 | 0.080898 | 0.024155 |
| 12 | 52 | -1.71 | 0.056721 | 0.089391 | 0.019093 |
| 10 | 54 | -1.43 | 0.081567 | 0.124075 | 0.029809 |
| 0  | 64 | -1.58 | 0.042768 | 0.081062 | 0.024279 |
| 17 | 48 | -0.77 | 0.042790 | 0.060064 | 0.022312 |
| 7  | 58 | -0.19 | 0.088919 | 0.094007 | 0.027082 |
| 16 | 49 | -0.12 | 0.054843 | 0.056733 | 0.015785 |
| 17 | 47 | -2.78 | 0.051851 | 0.140966 | 0.032082 |
| 4  | 60 | -2.03 | 0.040157 | 0.084665 | 0.021979 |
| 2  | 63 | -2.03 | 0.051618 | 0.103607 | 0.025638 |
| 18 | 47 | -2.27 | 0.079017 | 0.157614 | 0.034619 |
| 10 | 55 | -1.87 | 0.035528 | 0.084783 | 0.026372 |
| 4  | 61 | -2.08 | 0.057725 | 0.097159 | 0.018959 |
| 1  | 64 | -2.15 | 0.079515 | 0.154142 | 0.034687 |
| 5  | 60 | -1.40 | 0.077780 | 0.121717 | 0.031377 |
| 18 | 48 | -0.64 | 0.038844 | 0.052505 | 0.021210 |
| 3  | 63 | -1.34 | 0.064793 | 0.098206 | 0.025020 |
| 14 | 52 | -0.36 | 0.075506 | 0.083081 | 0.021117 |
| 12 | 54 | -0.80 | 0.083919 | 0.104305 | 0.025374 |
| 1  | 65 | -1.90 | 0.027378 | 0.070479 | 0.022726 |
| 17 | 49 | -1.27 | 0.027721 | 0.047880 | 0.015912 |
| 19 | 47 | -1.67 | 0.088462 | 0.140484 | 0.031144 |
| 11 | 55 | -0.91 | 0.066133 | 0.089290 | 0.025465 |
| 19 | 48 | -1.21 | 0.024680 | 0.051357 | 0.022100 |
| 17 | 50 | -1.25 | 0.082105 | 0.120294 | 0.030550 |
| 13 | 54 | -0.57 | 0.146856 | 0.166228 | 0.034184 |
| 16 | 51 | -0.16 | 0.106684 | 0.111228 | 0.028479 |
| 7  | 60 | -1.27 | 0.065891 | 0.098832 | 0.026010 |
| 13 | 63 | -2.03 | 0.066504 | 0.125916 | 0.029211 |
| 18 | 58 | -1.09 | 0.086702 | 0.118387 | 0.028992 |
| 15 | 61 | -2.01 | 0.053552 | 0.098291 | 0.022227 |
| 17 | 59 | -1.48 | 0.050982 | 0.086531 | 0.024061 |
| 10 | 66 | -1.77 | 0.037272 | 0.079341 | 0.023743 |
| 12 | 65 | -1.20 | 0.048230 | 0.069879 | 0.018084 |
| 19 | 58 | -1.19 | 0.072692 | 0.105446 | 0.027465 |
| 18 | 59 | -0.40 | 0.074809 | 0.084586 | 0.024620 |
| 11 | 67 | -0.44 | 0.127350 | 0.140951 | 0.030849 |
| 15 | 63 | -0.24 | 0.087190 | 0.092849 | 0.024065 |
| 17 | 61 | 0.62  | 0.108782 | 0.092730 | 0.026028 |
| 11 | 66 | -1.73 | 0.035133 | 0.075059 | 0.023098 |
| 5  | 73 | -1.68 | 0.093536 | 0.145454 | 0.030951 |
| 13 | 65 | -0.80 | 0.040919 | 0.057222 | 0.020280 |
| 19 | 59 | -0.92 | 0.059312 | 0.080169 | 0.022723 |
| 10 | 68 | -2.11 | 0.035445 | 0.090461 | 0.026128 |
| 9  | 69 | -1.46 | 0.088865 | 0.131885 | 0.029499 |
| 18 | 60 | -1.66 | 0.090145 | 0.143744 | 0.032348 |

|    |    |       |          |          |          |
|----|----|-------|----------|----------|----------|
| 9  | 70 | -1.95 | 0.070167 | 0.129409 | 0.030417 |
| 12 | 67 | -1.21 | 0.074266 | 0.102978 | 0.023688 |
| 17 | 62 | -1.00 | 0.051609 | 0.075126 | 0.023571 |
| 16 | 63 | -0.59 | 0.094297 | 0.110675 | 0.027597 |
| 14 | 65 | -1.13 | 0.042083 | 0.063968 | 0.019323 |
| 6  | 66 | -1.29 | 0.048511 | 0.078467 | 0.023297 |
| 12 | 60 | -1.29 | 0.062740 | 0.093995 | 0.024304 |
| 6  | 67 | -0.51 | 0.135755 | 0.152737 | 0.033368 |
| 11 | 62 | 0.38  | 0.076602 | 0.068120 | 0.022234 |
| 8  | 65 | -1.23 | 0.033626 | 0.058125 | 0.019963 |
| 15 | 64 | -2.31 | 0.036696 | 0.096646 | 0.025990 |
| 10 | 69 | -2.18 | 0.072492 | 0.140324 | 0.031055 |
| 19 | 60 | -2.31 | 0.063070 | 0.130154 | 0.029016 |
| 1  | 71 | -1.39 | 0.106643 | 0.155413 | 0.035160 |
| 2  | 70 | -0.74 | 0.111164 | 0.134267 | 0.031161 |
| 0  | 72 | -2.13 | 0.034525 | 0.087653 | 0.024893 |
| 5  | 67 | -2.45 | 0.057717 | 0.133800 | 0.031089 |
| 7  | 66 | -1.67 | 0.034903 | 0.073246 | 0.022957 |
| 19 | 54 | -1.00 | 0.115060 | 0.146390 | 0.031451 |
| 13 | 60 | -0.79 | 0.114866 | 0.141006 | 0.033050 |
| 15 | 60 | -1.58 | 0.053278 | 0.093461 | 0.025432 |
| 12 | 73 | -0.64 | 0.094835 | 0.110776 | 0.025009 |
| 15 | 70 | -0.72 | 0.074916 | 0.095494 | 0.028566 |
| 19 | 68 | -1.09 | 0.067836 | 0.096820 | 0.026483 |
| 14 | 72 | -0.69 | 0.129775 | 0.152429 | 0.032820 |
| 16 | 67 | -0.72 | 0.108322 | 0.129836 | 0.029754 |
| 14 | 68 | -0.14 | 0.094271 | 0.097875 | 0.025332 |
| 19 | 73 | -0.13 | 0.143054 | 0.147315 | 0.031758 |
| 18 | 71 | 0.18  | 0.173201 | 0.166714 | 0.035416 |
| 15 | 73 | -0.37 | 0.097363 | 0.106339 | 0.024458 |
| 16 | 72 | -0.03 | 0.146401 | 0.147466 | 0.033014 |
| 19 | 69 | -0.20 | 0.158963 | 0.165811 | 0.034913 |
| 10 | 62 | -2.73 | 0.018247 | 0.079916 | 0.022575 |
| 9  | 63 | -1.87 | 0.053652 | 0.099749 | 0.024659 |
| 7  | 65 | -2.31 | 0.021621 | 0.068633 | 0.020350 |
| 18 | 54 | -1.60 | 0.109646 | 0.164689 | 0.034465 |
| 8  | 64 | -1.59 | 0.102205 | 0.152909 | 0.031840 |
| 4  | 68 | -1.56 | 0.047878 | 0.080858 | 0.021083 |
| 15 | 57 | -2.67 | 0.053071 | 0.104889 | 0.019373 |
| 0  | 73 | -2.43 | 0.034471 | 0.091736 | 0.023518 |
| 1  | 72 | -2.25 | 0.086007 | 0.167596 | 0.036182 |
| 10 | 63 | -2.39 | 0.043244 | 0.105606 | 0.026084 |
| 15 | 58 | -2.32 | 0.042374 | 0.103368 | 0.026325 |
| 9  | 64 | -2.43 | 0.049598 | 0.119705 | 0.028857 |
| 17 | 56 | -1.82 | 0.026251 | 0.056086 | 0.016436 |
| 1  | 73 | -1.84 | 0.094011 | 0.158907 | 0.035195 |
| 7  | 67 | -1.23 | 0.078815 | 0.110237 | 0.025503 |
| 12 | 62 | -1.39 | 0.050515 | 0.076850 | 0.018989 |
| 9  | 65 | -2.01 | 0.028214 | 0.067155 | 0.019339 |
| 16 | 58 | -1.60 | 0.060049 | 0.106602 | 0.029064 |
| 19 | 55 | -1.51 | 0.049573 | 0.086199 | 0.024304 |
| 15 | 59 | -1.55 | 0.058935 | 0.092105 | 0.021334 |
| 8  | 66 | -1.69 | 0.036522 | 0.074513 | 0.022464 |
| 17 | 57 | -1.42 | 0.038867 | 0.067988 | 0.020496 |



|    |    |       |          |          |          |
|----|----|-------|----------|----------|----------|
| 2  | 73 | -1.26 | 0.094051 | 0.130727 | 0.029073 |
| 12 | 63 | -1.03 | 0.068031 | 0.091572 | 0.022841 |
| 14 | 61 | -0.49 | 0.079614 | 0.091183 | 0.023652 |
| 16 | 59 | -0.77 | 0.068048 | 0.086059 | 0.023256 |
| 10 | 64 | -2.75 | 0.044190 | 0.125845 | 0.029743 |
| 10 | 65 | -1.97 | 0.028729 | 0.070983 | 0.021443 |
| 17 | 58 | -1.86 | 0.055917 | 0.109998 | 0.029059 |
| 11 | 64 | -1.07 | 0.117046 | 0.152103 | 0.032887 |
| 7  | 68 | -0.24 | 0.075962 | 0.081899 | 0.024988 |
| 9  | 66 | -2.32 | 0.024008 | 0.075280 | 0.022075 |
| 18 | 67 | -2.63 | 0.068281 | 0.155922 | 0.033300 |
| 19 | 66 | -2.32 | 0.018323 | 0.072891 | 0.023516 |
| 17 | 68 | -1.56 | 0.057088 | 0.100123 | 0.027595 |
| 17 | 67 | -2.17 | 0.075608 | 0.142051 | 0.030609 |
| 19 | 65 | -1.56 | 0.029189 | 0.059554 | 0.019495 |
| 18 | 66 | -1.69 | 0.038956 | 0.079362 | 0.023907 |
| 14 | 73 | -1.62 | 0.090701 | 0.140362 | 0.030669 |
| 17 | 70 | -1.16 | 0.124019 | 0.165563 | 0.035764 |
| 19 | 67 | -1.75 | 0.087466 | 0.140535 | 0.030322 |
| 18 | 68 | -1.54 | 0.065523 | 0.109424 | 0.028490 |
| 17 | 69 | -0.76 | 0.141138 | 0.167805 | 0.035105 |
| 10 | 71 | -2.50 | 0.053615 | 0.129062 | 0.030195 |
| 9  | 72 | -1.74 | 0.078605 | 0.129387 | 0.029231 |
| 7  | 73 | -0.90 | 0.095143 | 0.119087 | 0.026665 |
| 14 | 67 | -2.37 | 0.059358 | 0.129962 | 0.029841 |
| 19 | 62 | -1.44 | 0.037722 | 0.068623 | 0.021428 |
| 18 | 63 | -1.92 | 0.069724 | 0.127177 | 0.029974 |
| 16 | 65 | -1.71 | 0.031043 | 0.068370 | 0.021852 |
| 15 | 66 | -2.02 | 0.039869 | 0.087138 | 0.023457 |
| 10 | 70 | -1.79 | 0.077874 | 0.134985 | 0.031969 |
| 18 | 62 | -1.24 | 0.041732 | 0.070588 | 0.023221 |
| 18 | 65 | -1.01 | 0.040074 | 0.061268 | 0.020913 |
| 0  | 2  | -5.27 | 0.047150 | 0.154877 | 0.020459 |
| 0  | 5  | -4.41 | 0.036059 | 0.110101 | 0.016785 |
| 4  | 2  | -4.44 | 0.061016 | 0.140584 | 0.017905 |
| 0  | 6  | -4.24 | 0.045444 | 0.138232 | 0.021905 |
| 4  | 3  | -4.00 | 0.026874 | 0.093593 | 0.016666 |
| 0  | 11 | -4.53 | 0.019737 | 0.099056 | 0.017491 |
| 4  | 15 | -4.34 | 0.071930 | 0.144213 | 0.016665 |
| 4  | 16 | -5.12 | 0.041714 | 0.099519 | 0.011298 |
| 1  | 19 | -4.18 | 0.014646 | 0.066606 | 0.012416 |
| 9  | 36 | -4.42 | 0.019627 | 0.078231 | 0.013253 |
| 14 | 36 | -3.67 | 0.013501 | 0.056649 | 0.011748 |
| 9  | 41 | -2.75 | 0.039449 | 0.106173 | 0.024246 |
| 0  | 48 | -4.15 | 0.021618 | 0.106259 | 0.020392 |
| 17 | 38 | -3.94 | 0.011149 | 0.050017 | 0.009870 |
| 4  | 48 | -3.48 | 0.036615 | 0.096893 | 0.017341 |
| 12 | 40 | -2.72 | 0.029705 | 0.101630 | 0.026401 |
| 16 | 36 | -3.19 | 0.026585 | 0.073373 | 0.014672 |
| 4  | 65 | -3.80 | 0.029445 | 0.091961 | 0.016456 |
| 4  | 66 | -3.52 | 0.021700 | 0.089011 | 0.019141 |
| 1  | 70 | -2.60 | 0.068357 | 0.164769 | 0.037142 |
| 4  | 67 | -1.86 | 0.045334 | 0.085057 | 0.021313 |
| 9  | 62 | -1.88 | 0.035263 | 0.074886 | 0.021118 |

|    |    |       |          |          |          |
|----|----|-------|----------|----------|----------|
| 6  | 65 | -1.10 | 0.036221 | 0.058852 | 0.020578 |
| 9  | 56 | -3.36 | 0.017366 | 0.064887 | 0.014164 |
| 4  | 62 | -3.24 | 0.041392 | 0.097515 | 0.017340 |
| 0  | 66 | -3.39 | 0.022023 | 0.094156 | 0.021279 |
| 2  | 64 | -2.42 | 0.053474 | 0.124628 | 0.029356 |
| 0  | 67 | -2.43 | 0.033370 | 0.085231 | 0.021303 |
| 2  | 65 | -1.56 | 0.037652 | 0.069294 | 0.020320 |
| 9  | 58 | -1.58 | 0.057084 | 0.098164 | 0.025946 |
| 18 | 49 | -0.81 | 0.021118 | 0.033548 | 0.015285 |
| 12 | 55 | -0.78 | 0.060320 | 0.077568 | 0.022068 |
| 1  | 66 | -1.69 | 0.034130 | 0.078739 | 0.026437 |
| 3  | 64 | -1.01 | 0.083870 | 0.112901 | 0.028773 |
| 17 | 64 | -2.83 | 0.054924 | 0.149706 | 0.033502 |
| 9  | 71 | -2.35 | 0.055536 | 0.122006 | 0.028323 |
| 17 | 63 | -2.26 | 0.053202 | 0.118432 | 0.028913 |
| 19 | 61 | -1.38 | 0.053638 | 0.086904 | 0.024149 |
| 14 | 66 | -1.01 | 0.056294 | 0.078365 | 0.021837 |
| 12 | 68 | -0.12 | 0.077339 | 0.080066 | 0.022392 |
| 16 | 64 | -1.77 | 0.079391 | 0.135779 | 0.031805 |
| 17 | 66 | -1.42 | 0.043073 | 0.077880 | 0.024526 |
| 15 | 65 | -2.89 | 0.029616 | 0.087850 | 0.020144 |
| 10 | 73 | -2.66 | 0.053633 | 0.132397 | 0.029657 |
| 15 | 68 | -1.73 | 0.040516 | 0.083611 | 0.024901 |
| 9  | 73 | -1.32 | 0.087308 | 0.124163 | 0.027993 |
| 19 | 64 | -2.91 | 0.054600 | 0.148196 | 0.032117 |
| 10 | 72 | -1.98 | 0.074183 | 0.136062 | 0.031270 |
| 15 | 67 | -1.48 | 0.062613 | 0.097532 | 0.023520 |
| 19 | 63 | -0.74 | 0.095142 | 0.115738 | 0.027720 |
| 16 | 66 | -1.01 | 0.054022 | 0.078714 | 0.024491 |
| 16 | 73 | -1.08 | 0.106476 | 0.140635 | 0.031535 |
| 17 | 65 | -2.38 | 0.014316 | 0.065516 | 0.021544 |
| 18 | 64 | -2.53 | 0.079704 | 0.168551 | 0.035081 |
| 17 | 72 | -1.54 | 0.108471 | 0.162129 | 0.034924 |
| 18 | 73 | -0.59 | 0.144461 | 0.164796 | 0.034696 |
| 19 | 71 | -0.00 | 0.147229 | 0.147386 | 0.032229 |
| 19 | 70 | -2.08 | 0.094066 | 0.166315 | 0.034796 |
| 17 | 71 | -1.39 | 0.103222 | 0.150916 | 0.034383 |
| 18 | 70 | -1.61 | 0.132050 | 0.192246 | 0.037293 |
| 19 | 72 | -1.58 | 0.106020 | 0.160429 | 0.034447 |
| 17 | 73 | -1.85 | 0.090665 | 0.151402 | 0.032841 |
| 18 | 72 | -1.53 | 0.125677 | 0.182295 | 0.037109 |
| 4  | 18 | -5.46 | 0.038777 | 0.114486 | 0.013868 |
| 0  | 25 | -4.94 | 0.025585 | 0.097763 | 0.014625 |
| 0  | 24 | -5.46 | 0.026529 | 0.110699 | 0.015416 |
| 4  | 25 | -5.02 | 0.019916 | 0.086820 | 0.013336 |
| 4  | 24 | -4.84 | 0.029558 | 0.096958 | 0.013937 |
| 15 | 16 | -4.49 | 0.033202 | 0.094249 | 0.013594 |
| 17 | 17 | -4.19 | 0.016354 | 0.056870 | 0.009673 |
| 0  | 34 | -4.09 | 0.021364 | 0.096663 | 0.018409 |
| 16 | 19 | -4.08 | 0.025740 | 0.066995 | 0.010116 |
| 14 | 19 | -4.49 | 0.011472 | 0.046244 | 0.007753 |
| 15 | 18 | -4.56 | 0.037450 | 0.110726 | 0.016052 |
| 2  | 36 | -4.20 | 0.026530 | 0.081551 | 0.013091 |
| 1  | 38 | -4.74 | 0.019971 | 0.067935 | 0.010121 |

|    |    |       |          |          |          |
|----|----|-------|----------|----------|----------|
| 19 | 17 | -3.92 | 0.012102 | 0.044685 | 0.008302 |
| 7  | 36 | -4.69 | 0.018947 | 0.088027 | 0.014715 |
| 15 | 25 | -4.50 | 0.017130 | 0.085860 | 0.015277 |
| 0  | 57 | -4.86 | 0.035944 | 0.121383 | 0.017596 |
| 0  | 62 | -3.99 | 0.028702 | 0.107088 | 0.019652 |
| 1  | 60 | -3.00 | 0.049925 | 0.138741 | 0.029643 |
| 17 | 43 | -2.22 | 0.049021 | 0.117039 | 0.030605 |
| 19 | 41 | -2.56 | 0.052069 | 0.124190 | 0.028180 |
| 5  | 63 | -1.68 | 0.067284 | 0.114389 | 0.028064 |
| 4  | 57 | -3.78 | 0.049114 | 0.108204 | 0.015625 |
| 0  | 60 | -2.95 | 0.021737 | 0.084521 | 0.021314 |
| 1  | 67 | -2.20 | 0.082279 | 0.153144 | 0.032163 |
| 3  | 65 | -2.29 | 0.027558 | 0.076598 | 0.021437 |
| 10 | 58 | -2.27 | 0.039154 | 0.103398 | 0.028286 |
| 9  | 59 | -2.58 | 0.027738 | 0.081452 | 0.020806 |
| 14 | 54 | -1.66 | 0.087237 | 0.138051 | 0.030570 |
| 4  | 64 | -1.60 | 0.046999 | 0.083796 | 0.023004 |
| 0  | 68 | -2.88 | 0.016270 | 0.081315 | 0.022595 |
| 4  | 56 | -4.88 | 0.043620 | 0.101217 | 0.011799 |
| 15 | 56 | -4.53 | 0.032081 | 0.096509 | 0.014212 |
| 15 | 49 | -4.18 | 0.026064 | 0.092269 | 0.015820 |
| 0  | 65 | -3.90 | 0.027248 | 0.101362 | 0.018997 |
| 10 | 56 | -3.57 | 0.014617 | 0.070055 | 0.015537 |
| 9  | 57 | -3.10 | 0.018537 | 0.075041 | 0.018218 |
| 15 | 52 | -3.50 | 0.038010 | 0.108953 | 0.020277 |
| 10 | 57 | -3.16 | 0.020212 | 0.081746 | 0.019477 |
| 9  | 67 | -3.21 | 0.028899 | 0.115155 | 0.026866 |
| 12 | 64 | -2.49 | 0.040921 | 0.104866 | 0.025703 |
| 10 | 67 | -2.90 | 0.041255 | 0.122344 | 0.027923 |
| 12 | 66 | -1.96 | 0.034078 | 0.074365 | 0.020589 |
| 15 | 62 | -3.00 | 0.032731 | 0.095685 | 0.020964 |
| 14 | 63 | -2.21 | 0.051687 | 0.110681 | 0.026704 |
| 13 | 64 | -2.06 | 0.098173 | 0.169524 | 0.034566 |
| 9  | 68 | -1.61 | 0.047850 | 0.087111 | 0.024376 |
| 17 | 60 | -1.80 | 0.074159 | 0.128747 | 0.030387 |
| 14 | 64 | -2.44 | 0.063527 | 0.140490 | 0.031547 |
| 0  | 15 | -6.47 | 0.042007 | 0.163191 | 0.018736 |
| 0  | 16 | -6.96 | 0.031179 | 0.116832 | 0.012314 |
| 2  | 17 | -6.58 | 0.022125 | 0.082685 | 0.009205 |
| 0  | 18 | -6.67 | 0.028918 | 0.129025 | 0.015015 |
| 1  | 17 | -6.32 | 0.017286 | 0.076173 | 0.009312 |
| 2  | 19 | -6.24 | 0.018466 | 0.077070 | 0.009393 |
| 10 | 17 | -5.69 | 0.028455 | 0.085512 | 0.010031 |
| 10 | 19 | -6.18 | 0.020112 | 0.080462 | 0.009773 |
| 9  | 19 | -6.25 | 0.016757 | 0.073479 | 0.009070 |
| 16 | 17 | -5.32 | 0.017817 | 0.072630 | 0.010304 |
| 3  | 36 | -6.12 | 0.024578 | 0.101177 | 0.012517 |
| 2  | 38 | -6.11 | 0.016611 | 0.072523 | 0.009145 |
| 0  | 46 | -5.45 | 0.025519 | 0.106874 | 0.014936 |
| 10 | 36 | -4.76 | 0.021536 | 0.085232 | 0.013384 |
| 7  | 38 | -6.20 | 0.023686 | 0.081561 | 0.009328 |
| 3  | 17 | -7.27 | 0.031382 | 0.102580 | 0.009788 |
| 0  | 20 | -7.45 | 0.030902 | 0.150976 | 0.016116 |
| 7  | 19 | -7.00 | 0.019804 | 0.086810 | 0.009577 |

|    |    |        |          |          |          |
|----|----|--------|----------|----------|----------|
| 9  | 17 | -6.52  | 0.021411 | 0.079279 | 0.008870 |
| 3  | 38 | -6.89  | 0.019125 | 0.090142 | 0.010305 |
| 9  | 38 | -6.07  | 0.015755 | 0.069140 | 0.008800 |
| 15 | 36 | -6.48  | 0.033633 | 0.127962 | 0.014565 |
| 0  | 49 | -5.77  | 0.030233 | 0.113813 | 0.014476 |
| 12 | 36 | -5.49  | 0.019619 | 0.091717 | 0.013133 |
| 10 | 38 | -5.45  | 0.020811 | 0.075512 | 0.010045 |
| 16 | 38 | -5.04  | 0.015525 | 0.063851 | 0.009591 |
| 4  | 49 | -5.37  | 0.029125 | 0.098596 | 0.012932 |
| 0  | 53 | -4.90  | 0.035530 | 0.133033 | 0.019896 |
| 0  | 52 | -4.83  | 0.026133 | 0.119843 | 0.019383 |
| 0  | 56 | -6.31  | 0.030776 | 0.114803 | 0.013315 |
| 3  | 19 | -8.05  | 0.024332 | 0.098375 | 0.009201 |
| 7  | 17 | -8.05  | 0.022728 | 0.092735 | 0.008692 |
| 12 | 19 | -8.18  | 0.020534 | 0.090402 | 0.008537 |
| 12 | 38 | -7.57  | 0.018599 | 0.084238 | 0.008669 |
| 12 | 17 | -9.31  | 0.023398 | 0.096220 | 0.007825 |
| 0  | 36 | -8.74  | 0.034375 | 0.159845 | 0.014356 |
| 4  | 36 | -8.25  | 0.036506 | 0.139220 | 0.012452 |
| 15 | 38 | -8.49  | 0.031789 | 0.121523 | 0.010574 |
| 15 | 19 | -10.94 | 0.028951 | 0.132179 | 0.009439 |
| 4  | 38 | -11.36 | 0.035412 | 0.131769 | 0.008478 |
| 15 | 17 | -12.58 | 0.030879 | 0.137731 | 0.008491 |
| 0  | 38 | -12.88 | 0.034941 | 0.155284 | 0.009343 |
| 0  | 19 | -14.16 | 0.036927 | 0.169821 | 0.009388 |
| 4  | 19 | -14.14 | 0.031627 | 0.144835 | 0.008008 |
| 0  | 17 | -18.14 | 0.038079 | 0.174829 | 0.007538 |
| 4  | 17 | -17.42 | 0.033349 | 0.149877 | 0.006689 |
