# Supplementary material for: Identification of Position-Specific Correlations between DNA-Binding Domains and Their Binding Sites. Application to the MerR Family of Transcription Factors
Source: PubMed Central journal article supplement (PMC5045206; doi:10.1371/journal.pone.0162681), 2016-09-30
Supplement: pone.0162681.s008.pdf [file pone.0162681.s008.pdf]

### Supporting figure S2. Heatmap of protein-DNA correlations with complete map of contacts.

TF positions are along the horizontal axis and at the Logo above. Site positions are along the vertical axis and at Logo on the left. The color denotes the Z-score for a pair of positions with the color palette for significantly correlated pairs in the yellow to red interval, while black through light green colors denote positions below the significance threshold. Protein-DNA interactions are shown as stars. Interactions observed in the structures of complexes at least once are shown. Elements of protein secondary structure (from the crystal structure of *E. coli* CueR – PDB ID 1Q05) are shown at the top.

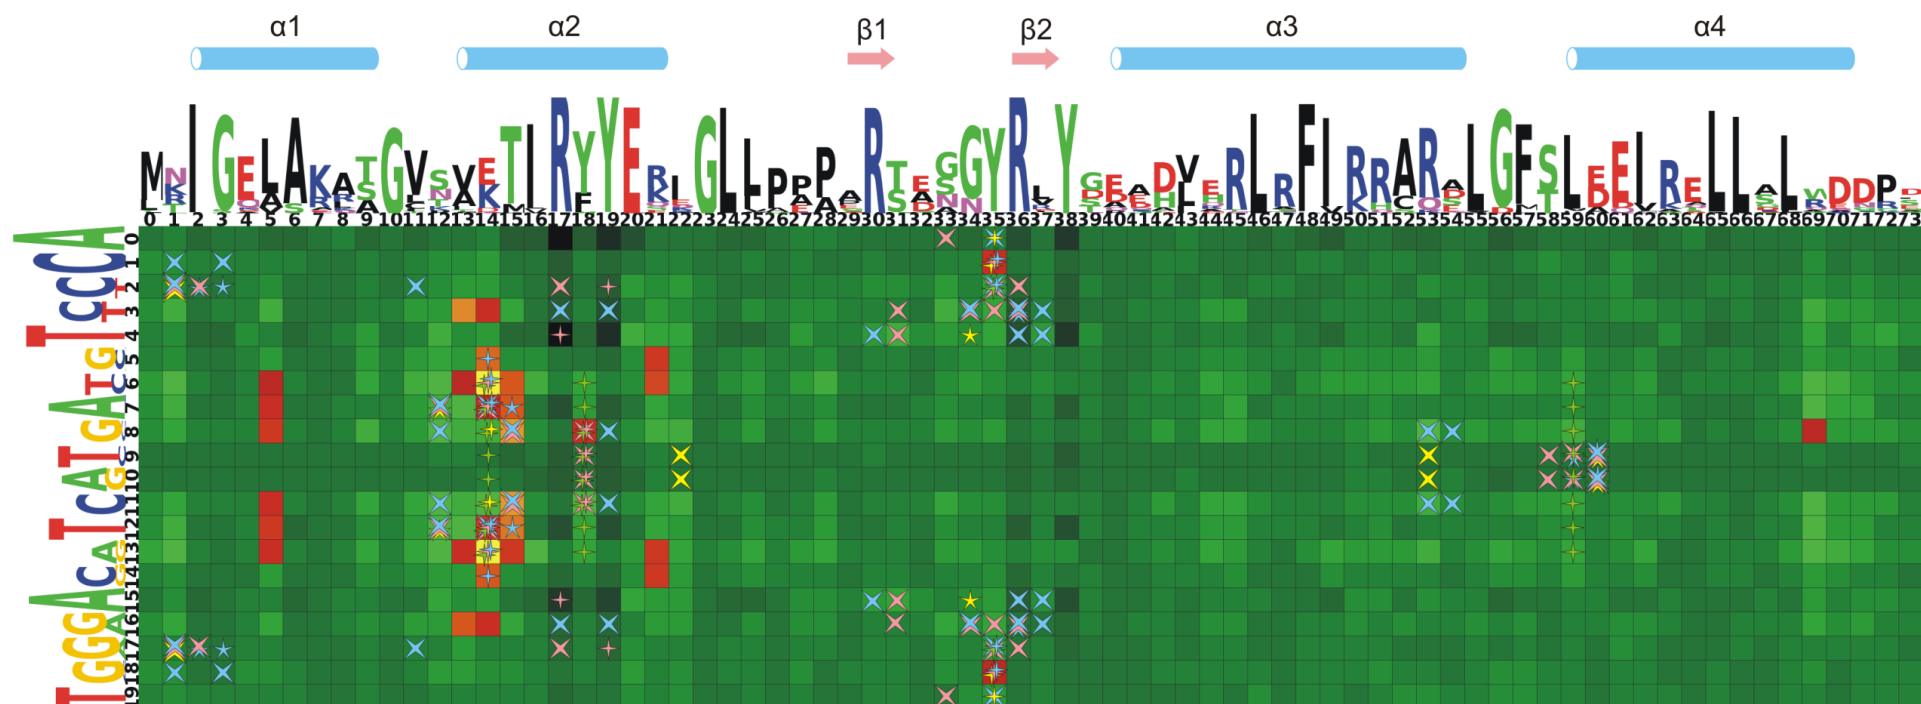

- Protein side chain - DNA **base** contacts
- + hydrogen bonds
- + water bridges
- + Van der Waals contacts
- + Hydrophobic contacts

- Protein side chain - DNA backbone contacts
- × hydrogen bonds
- × water bridges
- × van der Waals contacts
- Protein backbone - DNA backbone contacts
- × hydrogen bonds
- × water bridges
