# Supplementary material for: Identification of Position-Specific Correlations between DNA-Binding Domains and Their Binding Sites. Application to the MerR Family of Transcription Factors
Source: PubMed Central journal article supplement (PMC5045206; doi:10.1371/journal.pone.0162681), 2016-09-30

**Supporting figure S4. Phylogenetic tree of the TFs from the MERR family with pairs of residues in positions [5,14].**

Colors of branches show overrepresented pairs of residues in positions [5,14] (see color code in the picture). Background colors show TF subfamilies: red – CUER, blue – MERR, green – CADR-PBRR, beige – CADR-PBRR-like, pink-HMRTR.

G\_E  
C\_K  
A\_Q

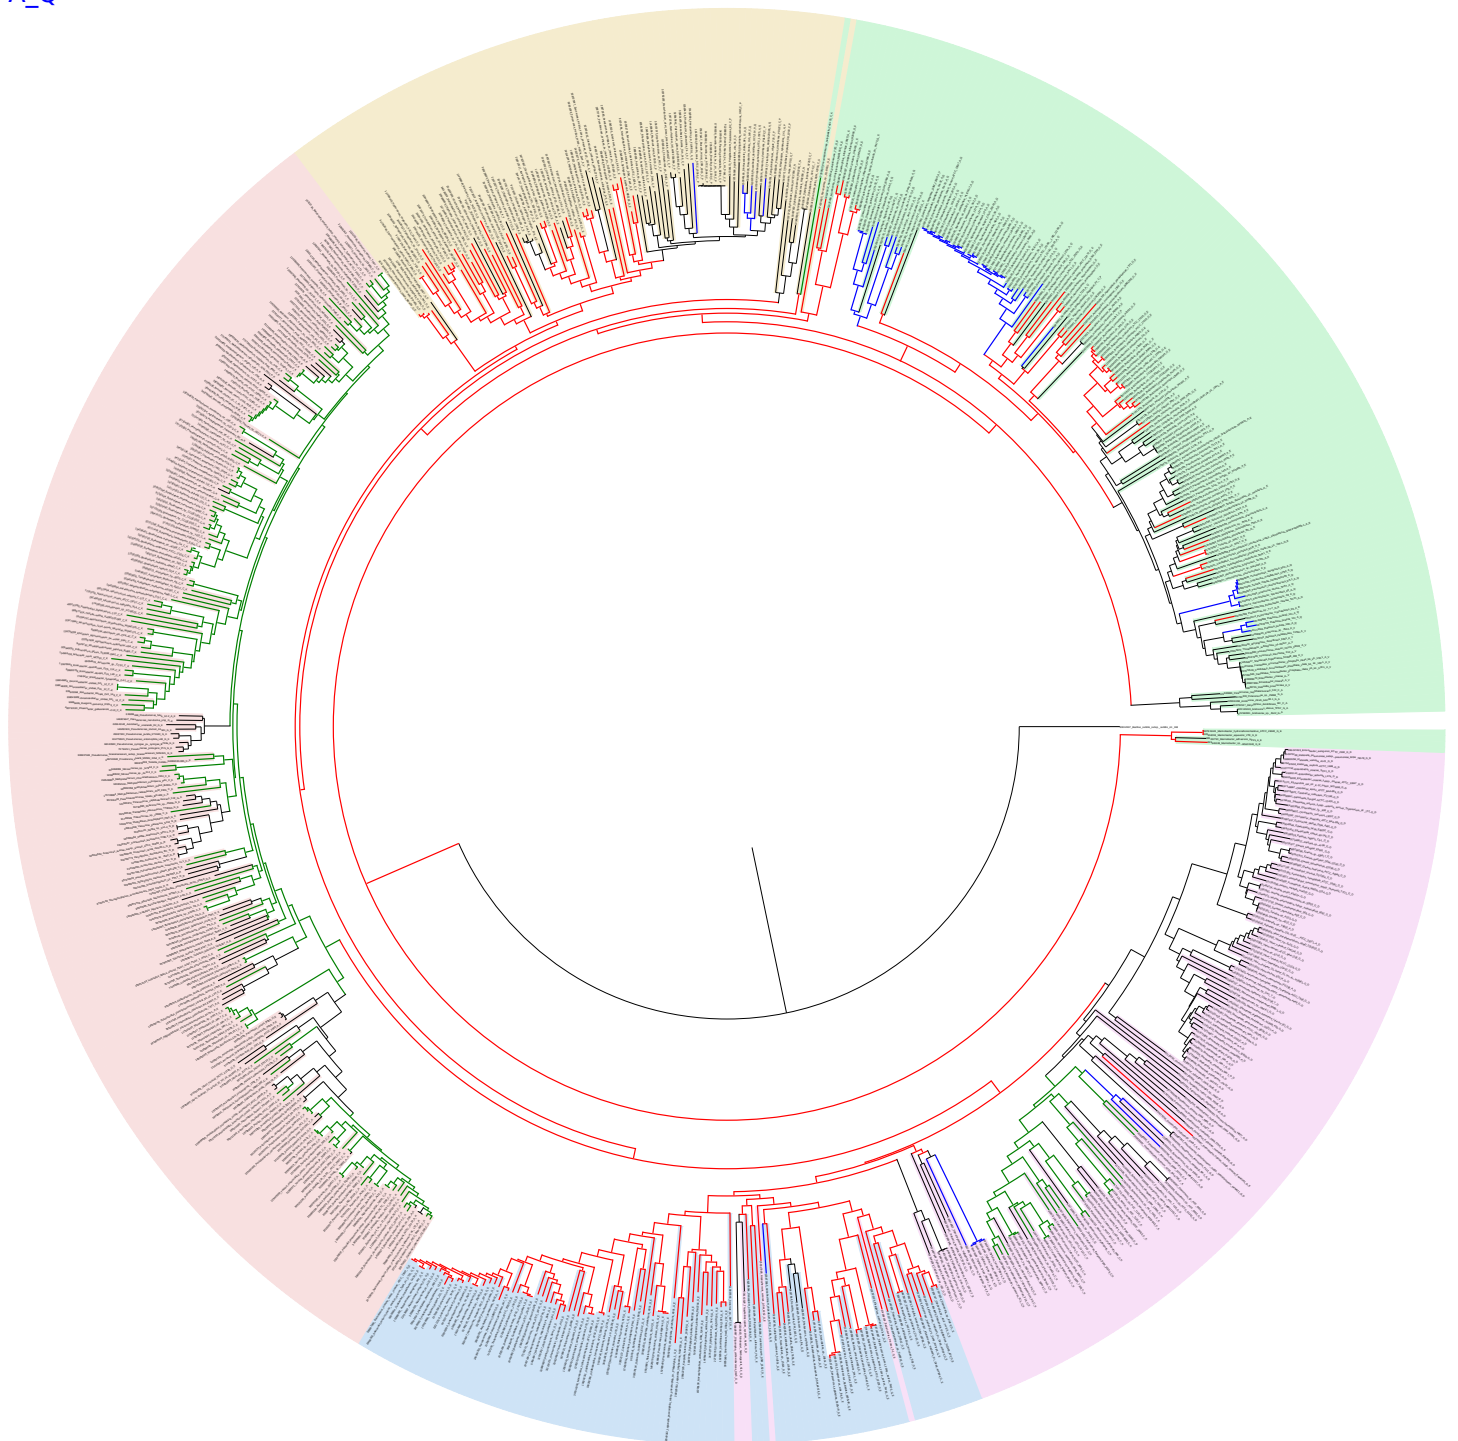

Supplement: pone.0162681.s010.pdf [file pone.0162681.s010.pdf]
