# Supplementary material for: Identification of Position-Specific Correlations between DNA-Binding Domains and Their Binding Sites. Application to the MerR Family of Transcription Factors
Source: PubMed Central journal article supplement (PMC5045206; doi:10.1371/journal.pone.0162681), 2016-09-30

**Supporting Figure S7. B-cutoff plot for shuffled regulator-site pairs**

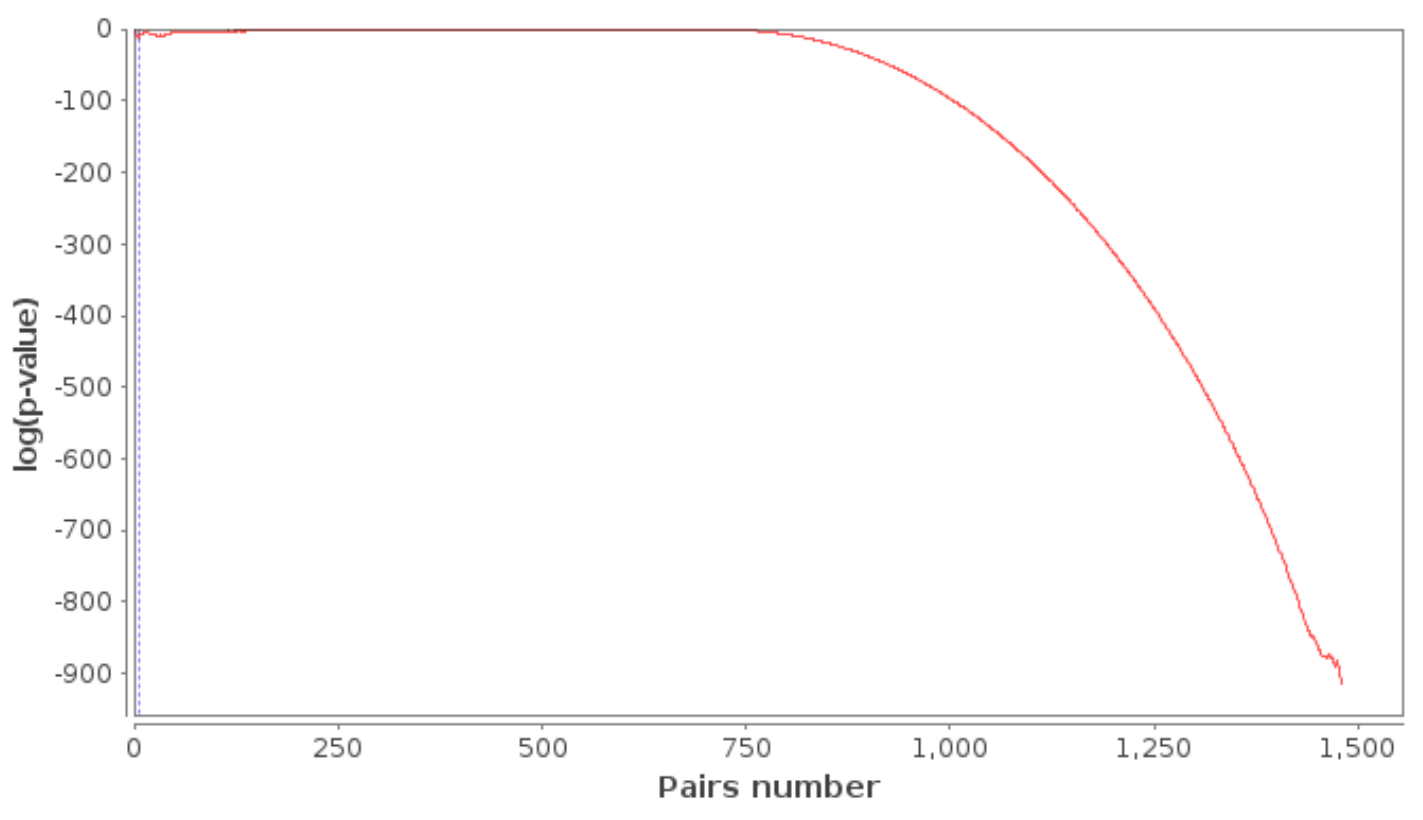

Supplement: pone.0162681.s013.pdf [file pone.0162681.s013.pdf]
